# Supplementary material for: Pigment cell progenitor heterogeneity and reiteration of developmental signaling underlie melanocyte regeneration in zebrafish
Source: eLife. 2023 Apr 6;12:e78942. doi: 10.7554/eLife.78942 (PMC10139689; doi:10.7554/eLife.78942)
Supplement: Figure 1—figure supplement 1—source data 1. [file elife-78942-fig1-figsupp1-data1.xlsx]

## Sheet: F1-S1B
FIGURE 1-FIGURE SUPPLEMENT 1B SOURCE DATA
Cells in groups
Group	Cell Number	Percent
mitfa+aox5lo	6070	20.6091
mitfa+aox5hi	19714	66.9338
mitfa-	3669	12.4571
Total Cells	29453
