# Supplementary material for: Pigment cell progenitor heterogeneity and reiteration of developmental signaling underlie melanocyte regeneration in zebrafish
Source: eLife. 2023 Apr 6;12:e78942. doi: 10.7554/eLife.78942 (PMC10139689; doi:10.7554/eLife.78942)
Supplement: Figure 1—figure supplement 2—source data 1. [file elife-78942-fig1-figsupp2-data1.xlsx]

## Sheet: S1-2B
FIGURE 1- FIGURE SUPPLEMENT 2B SOURCE DATA
Fraction of cells in sample
	Day0	Day1	Day2	Day3	Day5	Day10
Undiff mitfa+aox5lo	0.109526	0.205295	0.137029	0.201187	0.0910135	0.135753
Melanocytes	0.0808612	0.00949051	0.0215078	0.0287136	0.0223945	0.050436
Cycling Differentiation	0.00100138	0.00649351	0.00953437	0.0388591	0.0134941	0.00329955
mitfa+aox5hi	0.631618	0.378621	0.476275	0.367343	0.523686	0.558331
Cycling mitfa+aox5hi	0.00838653	0.0392108	0.0762749	0.0733155	0.12116	0.0040066
Iridophores	0.00738515	0.012987	0.016408	0.0248851	0.0129199	0.0219185
Schwann Cells	0.0256603	0.0814186	0.0665188	0.0648928	0.0376113	0.0431299
TRMs	0.00826136	0.00999001	0.0115299	0.0246937	0.0172265	0.0169691
Immune Cells	0.00625861	0.00624376	0.00864745	0.00861409	0.0137812	0.00754183
Neutrophils	0.00112655	0.0044955	0.0037694	0.00267994	0.00775194	0.00141409
Fibroblasts	0.0231568	0.0197303	0.0121951	0.0124426	0.0129199	0.0365308
Keratinocytes	0.00951308	0.0184815	0.00842572	0.00899694	0.00545507	0.0106057
Endothelial Cells	0.00275379	0.0014985	0.00133038	0	0	0.00141409
Transition	0.0200275	0.0172328	0.0281596	0.0419219	0.0378984	0.0301673
RBCs	0.00300413	0.00374625	0.00110865	0.000957121	0.000861326	0.00188546
Unknown	0.011641	0.112637	0.0709534	0.0553216	0.0232558	0.015555
High Mito	0.0498185	0.0724276	0.0503326	0.0451761	0.0585702	0.0610417
