# Supplementary material for: Pigment cell progenitor heterogeneity and reiteration of developmental signaling underlie melanocyte regeneration in zebrafish
Source: eLife. 2023 Apr 6;12:e78942. doi: 10.7554/eLife.78942 (PMC10139689; doi:10.7554/eLife.78942)
Supplement: Figure 2—figure supplement 1—source data 1. [file elife-78942-fig2-figsupp1-data1.xlsx]

## Sheet: F2-FS1D
SUPPLEMENTAL FIGURE 2D SOURCE DATA
Fraction of sample
	Day0_WT_Replicate_1	Day0_WT_Replicate_2
Direct Differentiation	0.0577689	0.0468432
Cycling Differentiation	0.0388446	0.0610998
Melanocytes	0.410359	0.435845
MP 1	0.163347	0.197556
MP 0	0.329681	0.258656
