# Supplementary material for: Pigment cell progenitor heterogeneity and reiteration of developmental signaling underlie melanocyte regeneration in zebrafish
Source: eLife. 2023 Apr 6;12:e78942. doi: 10.7554/eLife.78942 (PMC10139689; doi:10.7554/eLife.78942)
Supplement: Figure 2—source data 1. [file elife-78942-fig2-data1.xlsx]

## Sheet: F2D
FIGURE 2D SOURCE DATA
	Fraction of sample
	Day 0	Day 1	Day 2	Day 3	Day 5	Day 10
Melanocytes	0.418729	0.0363196	0.102493	0.0599556	0.124711	0.246212
Cycling Differentiation	0.0461538	0.0847458	0.157895	0.253886	0.240185	0.0972222
Direct Differentiation	0.0541806	0.0932203	0.137119	0.123612	0.108545	0.0795455
