# Supplementary material for: Pigment cell progenitor heterogeneity and reiteration of developmental signaling underlie melanocyte regeneration in zebrafish
Source: eLife. 2023 Apr 6;12:e78942. doi: 10.7554/eLife.78942 (PMC10139689; doi:10.7554/eLife.78942)
Supplement: Figure 3—source data 1. [file elife-78942-fig3-data1.xlsx]

## Sheet: F3C
FIGURE 3C SOURCE DATA
Expression (Log2FC)
Day	kita	kitlga
0	0.303456	0.43778
0	0.344458	0.505118
0	0.303907	0.514192
0	1.22251	1.04577
0	1.22912	1.07946
0	1.1657	0.960437
0	1.31918	1.61983
0	2.14666	1.55268
0	0.965013	1.28473
1	0.584374	1.11093
1	0.571227	1.11138
1	0.595349	1.1594
1	0.891928	1.648
1	0.960462	1.62491
1	0.845722	1.73478
1	1.4238	1.71485
1	1.33231	2.18916
1	1.37133	2.76867
1	2.2903	4.10524
1	2.41426	5.56807
1	2.16096	4.76441
3	0.637214	1.6289
3	0.608909	1.5914
3	0.606179	1.54204
3	0.886849	2.18267
3	0.914441	2.0447
3	0.992113	2.16035
3	0.88014	1.25915
3	0.703295	1.31544
3	0.705849	1.28434
3	0.609645	1.07792
3	0.897893	1.11395
3	0.8237	1.32682
5	0.723061	1.84011
5	0.837527	1.83252
5	0.872105	1.81996
5	0.845205	1.53587
5	0.707147	1.14507
5	0.795537	1.21586
5	1.07415	1.02038
5	1.32692	0.998637
5	0.822868	0.839406
5	0.69256	0.887985
5	0.909087	0.68172
5	0.831612	0.577525
7	1.26643	0.384661
7	1.03963	0.383814
7	0.772659	0.383771
7	1.54166	1.07237
7	1.6468	0.985372
7	0.896669	1.33705
14	1.21845	0.658667
14	1.33177	0.630014
14	1.03774	0.598456
