# Supplementary material for: Pigment cell progenitor heterogeneity and reiteration of developmental signaling underlie melanocyte regeneration in zebrafish
Source: eLife. 2023 Apr 6;12:e78942. doi: 10.7554/eLife.78942 (PMC10139689; doi:10.7554/eLife.78942)
Supplement: Figure 4—source data 1. — (B) Percentage of melanocyte regeneration in wild-type, kita(lf), and kitlga(lf) strains. (D) Proportion of WT and kita(lf) cells per scRNAseq sample in the cycling differentiation and direct differentiation subpopulations during regeneration. (E) Fates of progenitors following single-cell serial imaging of wild-type, kita(lf), and kitlga(lf) strains. [file elife-78942-fig4-data1.xlsx]

## Sheet: F4B
FIGURE 4B SOURCE DATA
Percentage melanocyte regeneration
WT	kita(lf)	kitlga(lf)
83.1776	14.4444	59.7015
153.722	24.4898	66.6667
68.4015	71.2329	96.7742
118.033	63.0631	38.6364
87.257	13.3333	85
103.044	72.2892	73.2394
80.6147	77.6	70.1754
87.6494	27.0588	62.7907
109.091	99	73.2558
75.1748		25.4545

## Sheet: F4D
FIGURE 4D SOURCE DATA
Cycling Differentiation - Fraction of sample
	WT	kita(lf)
Day2	0.157895	0.0788382
Day3	0.253886	0.114286
Day5	0.240185	0.199605
Direct Differentiation - Fraction of sample
	WT	kita(lf)
Day2	0.137119	0.0456432
Day3	0.123612	0.0131868
Day5	0.108545	0.0256917

## Sheet: F4E
FIGURE 4E SOURCE DATA
Animal	No. Cells	% Inactive	Ave. % Inactive	% Direct	Ave. % Direct	% Symmetric	Ave. % Symmetric	% Asymmetric	Ave. % Asymmetric
WT - 1	49	36.7347		24.4898		22.449		16.3265
WT - 2	59	45.7627		27.1186		15.2542		11.8644
WT - 3	53	37.7358		26.4151		18.8679		16.9811
WT - 4	33	42.4242	40.6644	24.2424	25.5665	21.2121	19.4458	12.1212	14.3233
kitfa(lf) - 1	50	76		2		18		4
kitfa(lf) - 2	50	74		4		8		14
kitfa(lf) - 3	53	75.4717		3.77359		15.0943		5.66038
kitfa(lf) - 4	28	67.8571	73.3322	3.57143	3.33625	21.4286	15.6307	7.14286	7.70081
kitlga(lf) - 1	52	73.0769		3.84615		17.3077		5.76923
kitlga(lf) - 2	39	74.359		7.69231		12.8205		5.12821
kitlga(lf) - 3	53	75.4717		3.77359		15.0943		5.66038
kitlga(lf) - 4	33	66.6667	72.3936	6.06061	5.34316	18.1818	15.8511	9.09091	6.41218
