# Supplementary material for: Pigment cell progenitor heterogeneity and reiteration of developmental signaling underlie melanocyte regeneration in zebrafish
Source: eLife. 2023 Apr 6;12:e78942. doi: 10.7554/eLife.78942 (PMC10139689; doi:10.7554/eLife.78942)
Supplement: Figure 5—figure supplement 1—source data 1. [file elife-78942-fig5-figsupp1-data1.xlsx]

## Sheet: F5-SF1
FIGURE 5- FIGURE SUPPLEMENT 1 SOURCE DATA
Melanocyte density
WT			Tg(mitfa:BRAFV600E)			kita(lf)			kita(lf);Tg(mitfa:BRAFV600E)
Day 0	Day 14		Day 0	Day 14		Day 0	Day 14		Day 0	Day 14
265	220		317	323		48	7		96	372
175	269		379	285		68	17		98	296
328	225		258	337		84	60		221	503
311	367		241	264		60	38		122	211
313	273		337	552		57	8		147	276
289	298		185	170		63	46		61	130
287	231		286	316		78	60		151	306
284	249		269	297		56	15		88	204
269	293		268	375		70	69
320	228		316	342
			257	219
			229	249
