# Supplementary material for: Pigment cell progenitor heterogeneity and reiteration of developmental signaling underlie melanocyte regeneration in zebrafish
Source: eLife. 2023 Apr 6;12:e78942. doi: 10.7554/eLife.78942 (PMC10139689; doi:10.7554/eLife.78942)
Supplement: Figure 5—source data 1. — (B) Quantification of ERK activity in progenitors and melanocytes. (D) Quantification of ERK activity in progenitors prior to and during melanocyte regeneration. (F) Quantification of melanocyte regeneration in kita(lf);Tg(mitfa:BRAFV600E) and control animals. [file elife-78942-fig5-data1.xlsx]

## Sheet: F5B
FIGURE 5B SOURCE DATA
Cytosolic / Nuclear mClover ratio
Melanocyte progenitors	Melanocytes
0.738	1.959
0.915	1.299
0.761	1.701
0.801	2.223
0.43	1.982
0.476	1.596
0.605	0.772
1	1.373
0.884
0.687
0.784
0.847
1.275
0.646
0.538
0.504

## Sheet: F5D
FIGURE 5D SOURCE DATA
	Cytosolic / Nuclear mClover ratio
	Day
Genotype	0	1	2	3	4	7	10	14
WT	0.43	1.17	1.044	1.115	1.299	1.299	1.123	0.906
WT	0.476	0.958	1.062	1.041	1.135	0.974	0.891	0.934
WT	0.605	0.886	1.184	1.339	1.174	1.077	0.832	0.49
WT	1	0.947	1.125	1.047	0.859	1.105	1.012	0.635
WT	0.884	0.753	1.011	1.164	1.271	1.034		0.863
WT	0.687			1.068	0.884	1.113		0.783
WT	0.784				0.995	0.812		0.763
WT	0.847				1.212			0.852
WT	1.275				0.802
WT	0.646				0.646
WT	0.538				1.068
WT	0.504				1.197
WT	1.212				1.128
WT	0.802				1.297
WT	0.646
WT	1.068
WT	1.197
kita(lf)	0.651	0.721	0.768	0.707	0.854	0.589	0.162	0.529
kita(lf)	0.794	0.463	0.827	0.689	0.732	0.634	0.76	0.743
kita(lf)	0.832	0.711	0.788	0.599	0.563	0.656	0.667	0.676
kita(lf)	0.805	0.736	0.734	0.637	0.669	0.655	0.642	0.614
kita(lf)	0.673	0.72	0.741	0.934	0.73	0.614	0.887	0.857
kita(lf)	0.515	0.656	0.752	0.62	0.601	0.606	0.913	0.948
kita(lf)	0.592	0.782			0.514	0.564	0.864	0.811
kita(lf)	0.717	0.687			0.563	0.52		0.854
kita(lf)	0.687					0.801		0.733
kita(lf)	0.672					0.838
kita(lf)	0.687					0.75
kita(lf)	0.596

## Sheet: F5F
FIGURE 5F SOURCE DATA
Percentage melanocyte regeneration
WT	Tg(mitfa:BRAFV600E)	kita(lf)	kita(lf);Tg(mitfa:BRAFV600E)
83.1776	101.893	14.4444	387.5
153.722	75.1979	24.4898	302.041
68.4015	130.62	71.2329	227.602
118.033	109.544	63.0631	172.951
87.257	163.798	13.3333	187.755
103.044	91.8919	72.2892	213.115
80.6147	110.489	77.6	202.649
87.6494	110.409	27.0588	231.818
109.091	139.925	99
75.1748	108.228
	85.214
	108.734
