# Supplementary material for: Pigment cell progenitor heterogeneity and reiteration of developmental signaling underlie melanocyte regeneration in zebrafish
Source: eLife. 2023 Apr 6;12:e78942. doi: 10.7554/eLife.78942 (PMC10139689; doi:10.7554/eLife.78942)
Supplement: Figure 6—source data 1. [file elife-78942-fig6-data1.xlsx]

## Sheet: F6D
FIGURE 6D SOURCE DATA
	Cycling Cells as Fraction of Sample
Day 0	0.00838653
Day 1	0.0392108
Day 2	0.0762749
Day 3	0.0733155
Day 5	0.12116
Day 10	0.0040066
