# Supplementary material for: Pigment cell progenitor heterogeneity and reiteration of developmental signaling underlie melanocyte regeneration in zebrafish
Source: eLife. 2023 Apr 6;12:e78942. doi: 10.7554/eLife.78942 (PMC10139689; doi:10.7554/eLife.78942)
Supplement: Figure 7—source data 1. — (B) PALM-EGFP fluorescence intensity of progenitors. (D) aox5 intensity in cells that underwent symmetric divisions or remained inactive. [file elife-78942-fig7-data1.xlsx]

## Sheet: F7B
FIGURE 7B SOURCE DATA
aox5 fluorescence intensity
3.61653
3.94986
3.90722
3.91435
3.76846
3.67184
3.69923
3.71475
3.83287
3.6578
3.96939
3.84433
3.67562
3.78676
3.80021
3.65338
3.71209
3.85543
3.81831
3.86522
3.89445
3.89657
3.72075
3.74265
3.63526
3.69327
3.61133
3.9423
3.9176
3.96717
3.90305
3.83104
3.79121
3.70375
3.7365
3.69341
3.65945
3.93974
3.91182
3.91254
3.9204
3.72467
3.69698
3.73327
3.72572
3.67387
3.91633
3.86593
3.86108
3.8775
3.63425
3.69649
3.67618
3.89485
3.84907
3.88835
3.86682
3.83594
3.7264
3.80794
3.7632
3.79982
3.74827
3.86124
3.69776
3.69011
3.6917
3.67173
3.74233
3.76864
3.73703
3.6249
3.63428

## Sheet: F7D
FIGURE 7D SOURCE DATA
aox5 fluorescence intensity
Symmetric	Inactive
3.88835	3.69011
3.86682	3.6917
3.86124	3.67173
3.83594	3.74233
3.7264	3.76864
3.80794	3.73703
3.7632	3.6249
3.79982	3.63428
3.74827
