# Supplementary material for: Pigment cell progenitor heterogeneity and reiteration of developmental signaling underlie melanocyte regeneration in zebrafish
Source: eLife. 2023 Apr 6;12:e78942. doi: 10.7554/eLife.78942 (PMC10139689; doi:10.7554/eLife.78942)
Supplement: Supplementary file 1. — Cluster labels (Table 1, Tab 1) and top 100 differentially expressed marker genes (Table 1, Tab 2) from Figure 1C, and number of cells sampled from each condition (Table 1, Tab 3) from Figure 1A, B. [file elife-78942-supp1.xlsx]

## Sheet: Cluster Labels
SUPPLEMENTAL FILE 1: Cluster Labels Reference

## Sheet: Cluster Markers
SUPPLEMENTAL FILE 1: Table of Cluster Markers
Cell Type	gene	avg_log2FC	p_val_adj
Precursor mitfa+aox5lo 1	eif3f	0.749006	0
Precursor mitfa+aox5lo 1	tpt1	0.901743	0
Precursor mitfa+aox5lo 1	cxcl18b	0.331927	0
Precursor mitfa+aox5lo 1	pmela	0.426538	0
Precursor mitfa+aox5lo 1	foxp4	0.697936	0
Precursor mitfa+aox5lo 1	rsl1d1	0.78324	0
Precursor mitfa+aox5lo 1	ddx21	0.938046	0
Precursor mitfa+aox5lo 1	rack1	1.07231	0
Precursor mitfa+aox5lo 1	mgat4b	0.870349	0
Precursor mitfa+aox5lo 1	eef1g	1.17845	0
Precursor mitfa+aox5lo 1	pdgfrl	0.493667	0
Precursor mitfa+aox5lo 1	slc25a5	0.863295	0
Precursor mitfa+aox5lo 1	adh5	0.699315	0
Precursor mitfa+aox5lo 1	gpx3	0.899234	0
Precursor mitfa+aox5lo 1	foxo1a	0.872673	0
Precursor mitfa+aox5lo 1	ece2b	0.492315	0
Precursor mitfa+aox5lo 1	nop53	1.21811	0
Precursor mitfa+aox5lo 1	eif3ea	0.717716	0
Precursor mitfa+aox5lo 1	FO082781.1	0.768025	0
Precursor mitfa+aox5lo 1	eif3ha	0.678268	0
Precursor mitfa+aox5lo 1	marcksb	0.563115	0
Precursor mitfa+aox5lo 1	chst15	0.525963	0
Precursor mitfa+aox5lo 1	si:dkey-206p8.1	0.413442	0
Precursor mitfa+aox5lo 1	mibp2	0.912665	0
Precursor mitfa+aox5lo 1	mt2	1.11111	0
Precursor mitfa+aox5lo 1	gnao1a	0.476961	0
Precursor mitfa+aox5lo 1	eif3m	0.964281	0
Precursor mitfa+aox5lo 1	kcnk6	0.962275	0
Precursor mitfa+aox5lo 1	gramd1bb	0.605301	0
Precursor mitfa+aox5lo 1	FP074902.2	0.64143	0
Precursor mitfa+aox5lo 1	sox4a	1.05065	0
Precursor mitfa+aox5lo 1	smap2	0.418681	0
Precursor mitfa+aox5lo 1	eef1a1l1	0.762169	0
Precursor mitfa+aox5lo 1	ptmab	0.685985	0
Precursor mitfa+aox5lo 1	gadd45bb	0.659802	0
Precursor mitfa+aox5lo 1	gtpbp4	1.04522	0
Precursor mitfa+aox5lo 1	pax3a	0.858805	0
Precursor mitfa+aox5lo 1	uba52	0.881178	0
Precursor mitfa+aox5lo 1	eef2b	0.69961	0
Precursor mitfa+aox5lo 1	zdhhc14	0.478183	0
Precursor mitfa+aox5lo 1	tmem242	1.47908	0
Precursor mitfa+aox5lo 1	kif26aa	0.55936	0
Precursor mitfa+aox5lo 1	atf3	0.787253	0
Precursor mitfa+aox5lo 1	slc22a2	0.588184	0
Precursor mitfa+aox5lo 1	hsp90ab1	0.834066	0
Precursor mitfa+aox5lo 1	eef1db	0.981563	0
Precursor mitfa+aox5lo 1	faua	0.903377	0
Precursor mitfa+aox5lo 1	gsdf	0.560429	0
Precursor mitfa+aox5lo 1	nsa2	0.957502	0
Precursor mitfa+aox5lo 1	ccni	0.914178	0
Precursor mitfa+aox5lo 1	ccng2	0.669663	0
Precursor mitfa+aox5lo 1	XLOC-020079	0.91392	0
Precursor mitfa+aox5lo 1	aqp3b	0.358247	0
Precursor mitfa+aox5lo 1	c7b	0.703928	0
Precursor mitfa+aox5lo 1	tmsb	1.72271	0
Precursor mitfa+aox5lo 1	grk6	0.475449	0
Precursor mitfa+aox5lo 1	cct6a	0.674983	0
Precursor mitfa+aox5lo 1	si:dkey-42i9.4	0.591274	0
Precursor mitfa+aox5lo 1	cirbpb	1.21295	0
Precursor mitfa+aox5lo 1	naca	0.993288	0
Precursor mitfa+aox5lo 1	emp3b	0.7279	0
Precursor mitfa+aox5lo 1	her9	0.724783	0
Precursor mitfa+aox5lo 1	si:dkey-151g10.6	0.674758	0
Precursor mitfa+aox5lo 1	bmp6	0.481449	0
Precursor mitfa+aox5lo 1	eif2s3	0.737502	0
Precursor mitfa+aox5lo 1	MCMDC2	0.564726	0
Precursor mitfa+aox5lo 1	vim	1.32509	0
Precursor mitfa+aox5lo 1	mchr2	0.854996	0
Precursor mitfa+aox5lo 1	zgc:114188	0.83147	0
Precursor mitfa+aox5lo 1	rsl24d1	1.21859	0
Precursor mitfa+aox5lo 1	mob2a	0.576483	0
Precursor mitfa+aox5lo 1	scn4ab	0.277834	0
Precursor mitfa+aox5lo 1	wnk4b	0.286925	0
Precursor mitfa+aox5lo 1	fthl27	0.867058	0
Precursor mitfa+aox5lo 1	fthl28	1.49141	0
Precursor mitfa+aox5lo 1	fthl30	1.17312	0
Precursor mitfa+aox5lo 1	fscn1a	0.643274	0
Precursor mitfa+aox5lo 1	XLOC-026578	0.399849	0
Precursor mitfa+aox5lo 1	eif3g	0.629877	0
Precursor mitfa+aox5lo 1	sypl1	0.389291	0
Precursor mitfa+aox5lo 1	ninj2	0.353377	0
Precursor mitfa+aox5lo 1	cct2	0.590638	0
Precursor mitfa+aox5lo 1	zmp:0000000794	0.464189	0
Precursor mitfa+aox5lo 1	AL845369.1	0.984425	0
Precursor mitfa+aox5lo 1	gria3a	0.281829	0
Precursor mitfa+aox5lo 1	rabl6b	0.932408	0
Precursor mitfa+aox5lo 1	btf3	1.01472	0
Precursor mitfa+aox5lo 1	mef2cb	0.847573	0
Precursor mitfa+aox5lo 1	ola1	0.67458	0
Precursor mitfa+aox5lo 1	eef1b2	0.873528	0
Precursor mitfa+aox5lo 1	trim63a	0.885358	0
Precursor mitfa+aox5lo 1	gpr17	0.728162	0
Precursor mitfa+aox5lo 1	serbp1a	0.838468	0
Precursor mitfa+aox5lo 1	si:dkey-23i12.5	0.743535	0
Precursor mitfa+aox5lo 1	mtbl	1.47249	0
Precursor mitfa+aox5lo 1	nkd1	0.352843	0
Precursor mitfa+aox5lo 1	SEMA4F	0.554958	0
Precursor mitfa+aox5lo 1	si:ch211-156j16.1	0.261596	0
Precursor mitfa+aox5lo 1	rhocb	0.676912	0
Precursor mitfa+aox5lo 1	CABZ01044746.1	0.298107	0
Precursor mitfa+aox5lo 2	ddx39aa	0.557236	0
Precursor mitfa+aox5lo 2	cxcl18b	0.810819	0
Precursor mitfa+aox5lo 2	cct4	0.757863	0
Precursor mitfa+aox5lo 2	npm1a	1.2575	0
Precursor mitfa+aox5lo 2	sod1	0.850291	0
Precursor mitfa+aox5lo 2	mir21-1	0.731035	0
Precursor mitfa+aox5lo 2	foxp4	1.19656	0
Precursor mitfa+aox5lo 2	snrpe	0.760839	0
Precursor mitfa+aox5lo 2	si:ch211-222l21.1	0.462083	0
Precursor mitfa+aox5lo 2	snu13b	0.765962	0
Precursor mitfa+aox5lo 2	cep170aa	0.539922	0
Precursor mitfa+aox5lo 2	khdrbs1a	0.93276	0
Precursor mitfa+aox5lo 2	rack1	0.739316	0
Precursor mitfa+aox5lo 2	hnrnpaba	0.954578	0
Precursor mitfa+aox5lo 2	slc43a1a	0.450408	0
Precursor mitfa+aox5lo 2	pdgfrl	0.484364	0
Precursor mitfa+aox5lo 2	slc25a5	0.744894	0
Precursor mitfa+aox5lo 2	cyfip2	0.313491	0
Precursor mitfa+aox5lo 2	hnrnpa0l	0.966929	0
Precursor mitfa+aox5lo 2	tmem35	0.388328	0
Precursor mitfa+aox5lo 2	pax3b	0.514647	0
Precursor mitfa+aox5lo 2	tubb5	0.696958	0
Precursor mitfa+aox5lo 2	cct3	0.740442	0
Precursor mitfa+aox5lo 2	stmn1b	0.893709	0
Precursor mitfa+aox5lo 2	FO082781.1	0.869618	0
Precursor mitfa+aox5lo 2	eif3ha	0.708618	0
Precursor mitfa+aox5lo 2	baz1a	0.577997	0
Precursor mitfa+aox5lo 2	marcksb	1.40319	0
Precursor mitfa+aox5lo 2	snrpd2	0.714325	0
Precursor mitfa+aox5lo 2	snrpd1	0.868333	0
Precursor mitfa+aox5lo 2	chd4a	0.59591	0
Precursor mitfa+aox5lo 2	tomm40l	0.506961	0
Precursor mitfa+aox5lo 2	sox4a	1.37719	0
Precursor mitfa+aox5lo 2	ilf2	0.747651	0
Precursor mitfa+aox5lo 2	ptmab	1.66018	0
Precursor mitfa+aox5lo 2	tmem125b	0.474316	0
Precursor mitfa+aox5lo 2	gadd45bb	1.19097	0
Precursor mitfa+aox5lo 2	pax3a	0.951228	0
Precursor mitfa+aox5lo 2	kif26aa	0.759974	0
Precursor mitfa+aox5lo 2	hsp90ab1	0.740092	0
Precursor mitfa+aox5lo 2	faua	0.650002	0
Precursor mitfa+aox5lo 2	ccni	0.301777	0
Precursor mitfa+aox5lo 2	snrpd3l	0.548373	0
Precursor mitfa+aox5lo 2	tmsb	2.12884	0
Precursor mitfa+aox5lo 2	dbn1	0.836177	0
Precursor mitfa+aox5lo 2	hmga1a	0.842902	0
Precursor mitfa+aox5lo 2	ptges3b	0.795706	0
Precursor mitfa+aox5lo 2	fkbp1ab	0.550338	0
Precursor mitfa+aox5lo 2	emp3b	0.759575	0
Precursor mitfa+aox5lo 2	rcc2	0.784014	0
Precursor mitfa+aox5lo 2	ribc1	0.437181	0
Precursor mitfa+aox5lo 2	tuba1a	0.662503	0
Precursor mitfa+aox5lo 2	hmgb2b	0.777431	0
Precursor mitfa+aox5lo 2	slc7a5	0.71961	0
Precursor mitfa+aox5lo 2	lsp1	0.401116	0
Precursor mitfa+aox5lo 2	ddx39ab	0.845902	0
Precursor mitfa+aox5lo 2	smarca4a	0.399433	0
Precursor mitfa+aox5lo 2	scn4ab	0.690672	0
Precursor mitfa+aox5lo 2	fthl27	1.05331	0
Precursor mitfa+aox5lo 2	prmt1	0.727206	0
Precursor mitfa+aox5lo 2	smarce1	0.547668	0
Precursor mitfa+aox5lo 2	fscn1a	0.62431	0
Precursor mitfa+aox5lo 2	phlda1	0.901359	0
Precursor mitfa+aox5lo 2	apex1	0.413811	0
Precursor mitfa+aox5lo 2	crestin	0.351088	0
Precursor mitfa+aox5lo 2	LOC110439533	0.371392	0
Precursor mitfa+aox5lo 2	rabl6b	0.973375	0
Precursor mitfa+aox5lo 2	tia1	0.489467	0
Precursor mitfa+aox5lo 2	selenom	0.312494	0
Precursor mitfa+aox5lo 2	gpr17	1.1438	0
Precursor mitfa+aox5lo 2	snrpb	0.944707	0
Precursor mitfa+aox5lo 2	jac1	0.904841	0
Precursor mitfa+aox5lo 2	snrpf	0.948058	0
Precursor mitfa+aox5lo 2	hmgb3a	0.877414	0
Precursor mitfa+aox5lo 2	sox6	0.418714	0
Precursor mitfa+aox5lo 2	mtbl	1.0738	0
Precursor mitfa+aox5lo 2	tyrp1a	0.678313	0
Precursor mitfa+aox5lo 2	hspd1	0.797862	0
Precursor mitfa+aox5lo 2	hacd2	0.547994	0
Precursor mitfa+aox5lo 2	si:ch211-39i22.1	2.09808	0
Precursor mitfa+aox5lo 2	FP236644.1	0.579818	0
Precursor mitfa+aox5lo 2	LOC103911284	0.4647	0
Precursor mitfa+aox5lo 2	LOC110438542	0.353626	0
Precursor mitfa+aox5lo 2	rtca	0.691418	9.40937e-303
Precursor mitfa+aox5lo 2	sae1	0.321115	9.17713e-300
Precursor mitfa+aox5lo 2	l1cama	0.359924	1.8187e-299
Precursor mitfa+aox5lo 2	BX284638.1	0.391229	5.66512e-298
Precursor mitfa+aox5lo 2	cct2	0.733127	1.38633e-297
Precursor mitfa+aox5lo 2	tmem243b	0.542683	2.73902e-297
Precursor mitfa+aox5lo 2	eef1g	0.753912	5.64072e-297
Precursor mitfa+aox5lo 2	nucks1a	0.597483	3.1486e-295
Precursor mitfa+aox5lo 2	mgat4b	0.501338	8.62356e-294
Precursor mitfa+aox5lo 2	dpf2l	0.397423	3.43666e-293
Precursor mitfa+aox5lo 2	cirbpb	0.746434	4.65789e-292
Precursor mitfa+aox5lo 2	clta	0.493587	6.37269e-291
Precursor mitfa+aox5lo 2	cct7	0.72354	4.48877e-290
Precursor mitfa+aox5lo 2	zgc:56676	0.669961	5.1447e-290
Precursor mitfa+aox5lo 2	mchr2	0.436637	2.96653e-289
Precursor mitfa+aox5lo 2	carm1	0.446731	4.01981e-289
Precursor mitfa+aox5lo 2	ppa1b	0.46007	2.9279e-288
Cycling differentiation	plk1	0.618425	0
Cycling differentiation	chtf18	0.376086	0
Cycling differentiation	hgsnat	0.468346	0
Cycling differentiation	tyrp1b	2.69369	0
Cycling differentiation	smc2	0.617884	0
Cycling differentiation	ncapd3	0.253287	0
Cycling differentiation	cenpk	0.348087	0
Cycling differentiation	dctd	0.333473	0
Cycling differentiation	rnaseh2a	0.548979	0
Cycling differentiation	lmnb1	0.552928	0
Cycling differentiation	si:ch211-266i6.3	0.724281	0
Cycling differentiation	rfc3	0.531184	0
Cycling differentiation	prr11	0.335298	0
Cycling differentiation	pcna	2.06958	0
Cycling differentiation	nuf2	0.57328	0
Cycling differentiation	pmela	2.55528	0
Cycling differentiation	cdk2	0.363332	0
Cycling differentiation	rfc4	0.539124	0
Cycling differentiation	kif22	0.366145	0
Cycling differentiation	dnajc9	0.690516	0
Cycling differentiation	ndc80	0.307232	0
Cycling differentiation	mki67	1.22083	0
Cycling differentiation	msh2	0.361589	0
Cycling differentiation	birc5a	0.613583	0
Cycling differentiation	lrrc20	0.44605	0
Cycling differentiation	dnph1	0.651495	0
Cycling differentiation	gins1	0.327402	0
Cycling differentiation	hells	1.06008	0
Cycling differentiation	nsd2	0.477089	0
Cycling differentiation	prim2	0.342743	0
Cycling differentiation	XLOC-005982	0.318317	0
Cycling differentiation	nusap1	0.828635	0
Cycling differentiation	fbxo5	0.297584	0
Cycling differentiation	mcm7	0.912342	0
Cycling differentiation	aurkb	0.664086	0
Cycling differentiation	si:dkey-185e18.7	0.276029	0
Cycling differentiation	slbp	0.810778	0
Cycling differentiation	ssrp1a	0.699976	0
Cycling differentiation	si:dkey-6i22.5	0.489788	0
Cycling differentiation	ccna2	0.496781	0
Cycling differentiation	qdpra	1.70025	0
Cycling differentiation	smc4	0.580347	0
Cycling differentiation	sae1	0.527982	0
Cycling differentiation	rpa1	0.592184	0
Cycling differentiation	rpa2	1.15658	0
Cycling differentiation	ttk	0.656937	0
Cycling differentiation	si:ch211-69g19.2	0.548353	0
Cycling differentiation	dscc1	0.272986	0
Cycling differentiation	cenpw	0.380429	0
Cycling differentiation	ccne2	0.343897	0
Cycling differentiation	atad2	0.435373	0
Cycling differentiation	fabp7a	0.974593	0
Cycling differentiation	lin52	0.563811	0
Cycling differentiation	cenpf	0.81752	0
Cycling differentiation	slc24a4a	0.334357	0
Cycling differentiation	orc3	0.340211	0
Cycling differentiation	slc24a5	0.813044	0
Cycling differentiation	dut	1.59895	0
Cycling differentiation	si:dkey-30c15.10	0.594761	0
Cycling differentiation	chtf8	0.371887	0
Cycling differentiation	gins2	0.666918	0
Cycling differentiation	cdca7b	0.674751	0
Cycling differentiation	zgc:91968	0.683984	0
Cycling differentiation	kifc1	0.296961	0
Cycling differentiation	cks1b	0.917796	0
Cycling differentiation	tomm40l	0.514454	0
Cycling differentiation	stmn1a	1.27767	0
Cycling differentiation	rpa3	1.31432	0
Cycling differentiation	pip4p2	0.674385	0
Cycling differentiation	anln	0.295198	0
Cycling differentiation	slc30a8	0.861343	0
Cycling differentiation	rrm2	0.938347	0
Cycling differentiation	cdca8	0.591801	0
Cycling differentiation	CABZ01005379.1	0.712894	0
Cycling differentiation	abhd3	0.447452	0
Cycling differentiation	kif2c	0.298456	0
Cycling differentiation	ing5b	0.542156	0
Cycling differentiation	lig1	1.12904	0
Cycling differentiation	ncapd2	0.519811	0
Cycling differentiation	mcm3	0.999867	0
Cycling differentiation	nsl1	0.257122	0
Cycling differentiation	pbk	0.285921	0
Cycling differentiation	rad51	0.390712	0
Cycling differentiation	zgc:86839	0.445238	0
Cycling differentiation	haus1	0.412812	0
Cycling differentiation	dck	0.676451	0
Cycling differentiation	chchd10	0.802505	0
Cycling differentiation	si:dkeyp-69c1.9	0.49086	0
Cycling differentiation	rfc2	0.383266	0
Cycling differentiation	slc29a2	0.261232	0
Cycling differentiation	rrm1	0.733477	0
Cycling differentiation	uhrf1	0.308004	0
Cycling differentiation	mibp	0.682155	0
Cycling differentiation	zgc:194627	0.827684	0
Cycling differentiation	mcm2	1.02625	0
Cycling differentiation	cks2	0.406332	0
Cycling differentiation	chaf1a	0.996945	0
Cycling differentiation	polr2h	0.557734	0
Cycling differentiation	ube2t	0.629433	0
Cycling differentiation	prim1	0.26628	0
Melanocytes	syngr3b	1.07058	0
Melanocytes	tyrp1b	4.90831	0
Melanocytes	mogat2	1.83866	0
Melanocytes	map6a	1.1178	0
Melanocytes	pmela	4.48407	0
Melanocytes	sncga	3.28663	0
Melanocytes	zdhhc2	2.71953	0
Melanocytes	FO704821.1	1.23453	0
Melanocytes	LOC103909099	1.71201	0
Melanocytes	slc24a5	1.50159	0
Melanocytes	sema3e	1.35947	0
Melanocytes	LOC100001178	1.87692	0
Melanocytes	mt2	1.96051	0
Melanocytes	zgc:91968	5.91056	0
Melanocytes	mylipa	2.7565	0
Melanocytes	slc30a8	1.55573	0
Melanocytes	viml	3.54533	0
Melanocytes	dixdc1b	2.4266	0
Melanocytes	prkar1b	4.10472	0
Melanocytes	pah	2.03764	0
Melanocytes	oca2	2.03425	0
Melanocytes	mtbl	3.31277	0
Melanocytes	tyrp1a	2.73718	0
Melanocytes	slc39a10	3.10538	0
Melanocytes	dct	1.48599	0
Melanocytes	si:dkeyp-69c1.9	1.04683	2.96475e-299
Melanocytes	rabl6b	2.25924	7.80479e-293
Melanocytes	icn	1.47196	3.32286e-290
Melanocytes	reep1	1.53644	1.23281e-284
Melanocytes	ttc38	0.941994	1.85418e-282
Melanocytes	XLOC-005982	0.87859	2.69025e-279
Melanocytes	slc24a4a	0.576663	2.82289e-268
Melanocytes	evla	1.33068	7.15757e-268
Melanocytes	mcamb	1.02027	1.77161e-247
Melanocytes	spock3	2.36576	3.84674e-247
Melanocytes	si:ch73-389b16.1	1.87276	1.21398e-227
Melanocytes	si:dkey-204f11.64	1.50295	7.66984e-226
Melanocytes	myl4	1.88085	2.49855e-222
Melanocytes	tspan10	1.72985	1.48274e-219
Melanocytes	dram2a	0.827542	5.93177e-217
Melanocytes	ckbb	1.86694	1.53092e-212
Melanocytes	defbl1	2.043	9.00073e-210
Melanocytes	ncam2	0.35498	8.61446e-201
Melanocytes	kif5ba	2.40236	6.29939e-195
Melanocytes	lima1a	1.35776	1.11977e-192
Melanocytes	kank1a	1.71268	8.7593e-192
Melanocytes	nxpe3	1.89775	5.54471e-184
Melanocytes	clu	1.62184	9.67343e-183
Melanocytes	slc6a15	0.552055	1.14924e-177
Melanocytes	gpr61	0.837538	3.26756e-177
Melanocytes	aadac	0.530848	1.16127e-176
Melanocytes	si:dkey-93n13.1	0.563467	2.67035e-176
Melanocytes	rgs16	0.736868	7.37495e-173
Melanocytes	gnai3	1.39466	3.97105e-165
Melanocytes	cdk15	2.20325	1.45905e-164
Melanocytes	zgc:163014	0.307071	2.2842e-160
Melanocytes	BX284638.1	1.85468	5.23471e-159
Melanocytes	coro1ca	2.19338	1.30015e-153
Melanocytes	myo5b	2.44794	6.1493e-152
Melanocytes	sptan1	2.10956	4.0971e-151
Melanocytes	slc29a3	0.379929	1.07167e-150
Melanocytes	mchr2	1.11023	4.34964e-147
Melanocytes	cfl1	0.904088	5.61342e-147
Melanocytes	zgc:193505	0.965128	1.94349e-144
Melanocytes	dync1li2	1.82197	2.97405e-142
Melanocytes	qpct	0.946628	8.65737e-140
Melanocytes	ccni	1.59632	1.28986e-139
Melanocytes	sypl1	0.603042	5.16839e-137
Melanocytes	alkal2b	0.765944	2.22111e-135
Melanocytes	ptgr1	1.75258	1.03457e-125
Melanocytes	aldh9a1a.1	2.16915	2.58375e-123
Melanocytes	stk17a	0.860509	1.05406e-117
Melanocytes	si:ch211-108c6.2	1.98489	4.1027e-116
Melanocytes	slc6a17	0.515367	8.60297e-116
Melanocytes	net1	2.06696	4.15725e-115
Melanocytes	map1ab	1.35095	7.08928e-114
Melanocytes	ywhag2	0.480922	1.48171e-113
Melanocytes	myo1ca	1.80996	1.14633e-109
Melanocytes	stx12l	0.64691	2.05317e-109
Melanocytes	slitrk6	0.50441	1.83793e-108
Melanocytes	csnk2b	2.00601	4.73215e-108
Melanocytes	yjefn3	1.07303	3.48579e-106
Melanocytes	atp6v0a2b	0.403637	3.42614e-104
Melanocytes	ahnak	1.49957	2.26328e-102
Melanocytes	CLEC3A	0.526713	4.17092e-101
Melanocytes	anxa2a	1.13384	2.67903e-99
Melanocytes	tmem65	1.35667	5.7558e-99
Melanocytes	XLOC-038073	1.5974	3.34835e-98
Melanocytes	adra2b	1.16791	3.42714e-96
Melanocytes	ccdc28b	0.995244	4.83625e-96
Melanocytes	map7d3	1.88895	2.58176e-95
Melanocytes	chd5	0.646875	3.09666e-95
Melanocytes	mlana	0.280306	7.30644e-95
Melanocytes	cd81a	1.81039	1.68815e-94
Melanocytes	birc7	0.846044	3.95083e-91
Melanocytes	hgsnat	0.479762	8.56143e-89
Melanocytes	ywhaz	1.08668	9.48406e-85
Melanocytes	qdpra	1.40825	2.96915e-82
Melanocytes	adss	0.553178	9.98341e-82
Melanocytes	Sept_15	1.46274	4.4e-81
mitfa+aox5lo 5	stat1b	1.65159	0
mitfa+aox5lo 5	isg15	1.92168	3.27438e-264
mitfa+aox5lo 5	CU984600.2	2.34704	6.33918e-243
mitfa+aox5lo 5	si:dkey-42i9.7	1.11608	1.21375e-231
mitfa+aox5lo 5	tdp2a	0.734999	5.47585e-219
mitfa+aox5lo 5	si:ch211-281g13.5	0.620034	1.87539e-218
mitfa+aox5lo 5	dhx58	1.6859	3.22548e-213
mitfa+aox5lo 5	mxa	0.952205	1.21916e-212
mitfa+aox5lo 5	mxe	1.1766	4.46467e-204
mitfa+aox5lo 5	wu:fj29h11	1.74319	5.83667e-194
mitfa+aox5lo 5	gig2e	0.530045	6.65399e-189
mitfa+aox5lo 5	helz2	0.819051	1.10252e-168
mitfa+aox5lo 5	lgals17	1.71581	4.93574e-166
mitfa+aox5lo 5	ifit8	0.344109	1.12373e-159
mitfa+aox5lo 5	FQ377660.1	0.493293	5.22308e-157
mitfa+aox5lo 5	irf7	1.03082	8.00406e-153
mitfa+aox5lo 5	CR318588.2	1.11347	1.13411e-150
mitfa+aox5lo 5	mxb	0.415845	9.94311e-148
mitfa+aox5lo 5	rnf213b	1.81726	9.85428e-143
mitfa+aox5lo 5	znfx1	1.41777	1.97519e-138
mitfa+aox5lo 5	LOC101885345	1.02905	2.6963e-138
mitfa+aox5lo 5	si:dkey-79f11.9	0.450229	1.69249e-133
mitfa+aox5lo 5	si:dkey-68o6.6	0.496298	1.22181e-132
mitfa+aox5lo 5	slc47a2.2	0.406829	1.27545e-127
mitfa+aox5lo 5	stat2	1.47619	2.13287e-126
mitfa+aox5lo 5	ifit16	0.975493	4.09219e-125
mitfa+aox5lo 5	LOC558721	0.273004	5.58349e-125
mitfa+aox5lo 5	parp12b	0.861456	1.21955e-121
mitfa+aox5lo 5	mov10b.1	1.11733	1.02661e-120
mitfa+aox5lo 5	tmsb	2.31634	1.11669e-120
mitfa+aox5lo 5	trim35-14	0.343407	6.19765e-117
mitfa+aox5lo 5	LOC553316	1.6565	8.26154e-114
mitfa+aox5lo 5	si:ch211-1a19.3	0.937129	5.54602e-113
mitfa+aox5lo 5	jac1	1.11629	5.84013e-113
mitfa+aox5lo 5	si:dkey-188i13.6	1.05035	7.24043e-108
mitfa+aox5lo 5	phf11	0.857581	1.27212e-107
mitfa+aox5lo 5	LOC101882375	0.491656	2.54207e-107
mitfa+aox5lo 5	cxcl18b	1.92063	6.01414e-107
mitfa+aox5lo 5	si:rp71-77l1.2	0.35649	9.32544e-107
mitfa+aox5lo 5	si:ch211-281g13.4	0.265418	1.09489e-106
mitfa+aox5lo 5	fas	0.924558	1.47474e-105
mitfa+aox5lo 5	foxp4	1.11843	2.41368e-100
mitfa+aox5lo 5	zgc:152791	1.90312	9.54818e-100
mitfa+aox5lo 5	scn4ab	1.17241	5.21617e-98
mitfa+aox5lo 5	mxc	1.271	1.1126e-97
mitfa+aox5lo 5	ifi45	2.51923	1.63934e-96
mitfa+aox5lo 5	ifit12	0.401796	9.66712e-96
mitfa+aox5lo 5	si:dkey-85k7.12	0.699542	1.2646e-94
mitfa+aox5lo 5	si:ch211-153b23.7	0.655263	5.90671e-92
mitfa+aox5lo 5	aste1a	1.07205	4.26927e-89
mitfa+aox5lo 5	ftr11	0.30582	5.18423e-89
mitfa+aox5lo 5	si:ch211-271e10.6	0.666692	1.53172e-88
mitfa+aox5lo 5	zmp:0000000912	0.706398	3.34806e-88
mitfa+aox5lo 5	si:dkeyp-9d4.2	1.34314	4.79772e-88
mitfa+aox5lo 5	si:ch211-199g17.2	0.828024	1.3434e-87
mitfa+aox5lo 5	ltk	0.684873	1.30373e-84
mitfa+aox5lo 5	si:ch211-183d5.2	1.17113	3.85809e-84
mitfa+aox5lo 5	socs1b	0.525755	2.03904e-83
mitfa+aox5lo 5	rsad2	0.742333	2.98783e-83
mitfa+aox5lo 5	XLOC-042596	0.447906	1.01114e-82
mitfa+aox5lo 5	xaf1	0.888863	1.09069e-82
mitfa+aox5lo 5	si:ch211-212k18.15	0.47569	2.61668e-81
mitfa+aox5lo 5	LOC110437969	0.613539	3.40567e-81
mitfa+aox5lo 5	LOC101883594	0.407621	4.28213e-81
mitfa+aox5lo 5	marcksb	1.12802	3.23332e-77
mitfa+aox5lo 5	si:dkey-97a13.6	0.664308	7.49029e-77
mitfa+aox5lo 5	si:ch211-39i22.1	1.77128	4.91786e-76
mitfa+aox5lo 5	wu:fb64b08	0.603983	1.36601e-75
mitfa+aox5lo 5	si:ch73-190m4.1	0.330011	4.47721e-75
mitfa+aox5lo 5	si:dkey-23k10.3	0.341484	3.78665e-74
mitfa+aox5lo 5	LOC110439931	0.269221	2.82387e-72
mitfa+aox5lo 5	sox4a	1.50502	3.8799e-71
mitfa+aox5lo 5	si:dkey-79f11.10	1.00094	4.63129e-71
mitfa+aox5lo 5	ribc1	0.61671	1.76871e-70
mitfa+aox5lo 5	ms4a17a.7	0.604392	6.73019e-69
mitfa+aox5lo 5	ftr63	0.410591	1.28256e-68
mitfa+aox5lo 5	rnf213a	1.67244	3.33323e-68
mitfa+aox5lo 5	pax3a	1.35458	7.78e-67
mitfa+aox5lo 5	trim25	0.889074	1.14372e-64
mitfa+aox5lo 5	zmp:0000000735	0.811228	1.71106e-64
mitfa+aox5lo 5	si:dkey-40g16.6	0.584968	2.16044e-64
mitfa+aox5lo 5	si:ch211-219a4.3	0.850494	3.98576e-64
mitfa+aox5lo 5	eif2ak2	0.698309	1.65263e-63
mitfa+aox5lo 5	zgc:195173	0.783619	6.60288e-60
mitfa+aox5lo 5	CABZ01000634.1	0.811392	2.16518e-58
mitfa+aox5lo 5	ptmab	1.58548	4.31963e-58
mitfa+aox5lo 5	ifit10	0.893263	5.92792e-58
mitfa+aox5lo 5	si:ch211-245h14.1	0.523785	6.65094e-58
mitfa+aox5lo 5	ifi35	0.682398	1.92212e-57
mitfa+aox5lo 5	CABZ01073795.1	1.21076	7.16257e-57
mitfa+aox5lo 5	si:dkey-23i12.7	0.794877	2.25739e-56
mitfa+aox5lo 5	si:ch211-132p1.3	1.24658	2.60243e-56
mitfa+aox5lo 5	si:dkey-188i13.9	0.980417	3.10473e-56
mitfa+aox5lo 5	otud4	0.254009	5.31715e-56
mitfa+aox5lo 5	epsti1	0.646598	2.31864e-55
mitfa+aox5lo 5	si:dkey-188i13.10	0.987718	2.78325e-55
mitfa+aox5lo 5	irge4	0.467375	5.46079e-55
mitfa+aox5lo 5	kif26aa	0.611266	1.96358e-54
mitfa+aox5lo 5	eef1db	1.28468	9.08231e-53
mitfa+aox5lo 5	ftr56	0.537951	4.45434e-52
Iridophores	pcdh18a	0.588677	0
Iridophores	tcirg1a	1.21501	0
Iridophores	si:ch211-243a20.3	3.23607	0
Iridophores	mcf2la	0.379987	0
Iridophores	sytl2a	1.44859	0
Iridophores	si:dkey-197i20.6	2.94506	0
Iridophores	prelp	1.42846	0
Iridophores	csf1a	0.966477	0
Iridophores	myof	0.783756	0
Iridophores	CABZ01072077.1	2.30022	0
Iridophores	pcdh10b	0.403347	0
Iridophores	sytl2b	2.92713	0
Iridophores	lypc	5.56906	0
Iridophores	crabp2a	1.80216	0
Iridophores	si:ch211-105c13.3	1.53033	0
Iridophores	akap12a	4.0323	0
Iridophores	ltk	1.33352	0
Iridophores	alx4b	2.3343	0
Iridophores	prx	1.69271	0
Iridophores	gsdmea	0.88412	0
Iridophores	gpnmb	3.20836	0
Iridophores	s100v2	1.97572	0
Iridophores	si:ch211-38m6.6	0.650721	0
Iridophores	apoda.1	5.14776	0
Iridophores	zgc:101840	2.73385	0
Iridophores	daam1b	1.48714	0
Iridophores	akap12b	2.36917	0
Iridophores	fam84a	0.411515	0
Iridophores	cx43	0.917541	0
Iridophores	LOC101884756	3.50366	0
Iridophores	defbl1	5.37192	0
Iridophores	FQ323119.1	0.358754	0
Iridophores	sulf2b	1.42845	0
Iridophores	unm-sa821	1.44799	0
Iridophores	CR318624.2	0.763407	0
Iridophores	slc25a38a	0.377104	0
Iridophores	tanc2a	0.849519	0
Iridophores	si:ch211-256m1.8	2.98675	0
Iridophores	si:ch73-89b15.3	0.748881	0
Iridophores	ppfibp1a	1.59107	0
Iridophores	si:ch211-137i24.10	2.05898	0
Iridophores	hdr	0.595903	0
Iridophores	tgfa	0.410213	0
Iridophores	alx4a	3.46956	0
Iridophores	dpep2	0.935395	0
Iridophores	cdh11	2.67124	0
Iridophores	si:dkey-70p6.1	0.500231	0
Iridophores	fhl2a	3.6951	0
Iridophores	itgb5	0.794827	0
Iridophores	znf385b	1.11713	0
Iridophores	ponzr1	1.20998	5.63256e-298
Iridophores	tfec	1.99874	8.16306e-270
Iridophores	tspan9a	1.22943	1.62539e-244
Iridophores	pcdh7b	1.0951	1.42145e-241
Iridophores	crestin	0.855931	4.30512e-234
Iridophores	nuak1b	0.940499	7.71286e-231
Iridophores	tpm4a	0.883127	9.13471e-230
Iridophores	SEMA4F	1.16967	1.60434e-219
Iridophores	nav3	0.516538	6.93185e-215
Iridophores	kcnip3b	0.29471	1.73992e-211
Iridophores	lmo4a	0.459606	6.17621e-210
Iridophores	LOC103909099	1.94968	2.60524e-206
Iridophores	ano1	0.531214	3.52673e-202
Iridophores	lgals1l1	0.525592	1.2628e-192
Iridophores	ttyh2l	1.02374	6.82885e-192
Iridophores	fhl3a	0.722354	1.0362e-187
Iridophores	reep3a	1.1021	2.55978e-186
Iridophores	dpyda.1	0.707094	1.13393e-184
Iridophores	aplp1	0.88023	8.25362e-184
Iridophores	fmnl2b	0.839607	1.84439e-175
Iridophores	crip1	1.8591	3.78492e-174
Iridophores	sox4a	1.78419	4.42787e-174
Iridophores	tagln3b	0.820792	1.18645e-172
Iridophores	si:dkey-4e7.3	1.08126	5.66874e-171
Iridophores	LOC110438542	0.745972	1.04814e-170
Iridophores	zgc:110045	0.503254	1.89142e-170
Iridophores	si:dkey-250k10.4	1.38173	1.22779e-158
Iridophores	zfhx4	1.47933	1.56254e-157
Iridophores	sh3kbp1	1.17245	1.45292e-152
Iridophores	sdhda	0.434758	6.75047e-151
Iridophores	FO704610.1	0.420831	2.57224e-146
Iridophores	44451	0.536317	3.64858e-146
Iridophores	birc5a	0.670918	4.83185e-146
Iridophores	afap1	0.607384	7.32985e-142
Iridophores	alcama	0.708219	2.24072e-129
Iridophores	pik3r3b	1.06258	3.73819e-126
Iridophores	smim29	1.63469	8.37886e-126
Iridophores	emp3b	1.16793	1.42648e-125
Iridophores	pltp	0.766764	6.11544e-125
Iridophores	ptk7a	1.0032	3.10946e-124
Iridophores	lhfpl2b	1.08704	2.76335e-123
Iridophores	tenm3	0.510012	2.922e-123
Iridophores	rab38b	0.515609	1.81959e-122
Iridophores	XLOC-006525	0.374313	1.25719e-118
Iridophores	s100u	0.892751	2.25563e-116
Iridophores	plekhg4	0.49079	4.51995e-116
Iridophores	LOC110439533	0.684409	4.18478e-115
Iridophores	si:ch211-39i22.1	1.50706	5.83697e-115
Iridophores	ptmab	1.25584	1.32677e-114
Iridophores	plxna4	0.741082	3.82308e-112
Unknown Transition	si:ch1073-159d7.13	2.80822	1.14078e-267
Unknown Transition	fosab	2.30831	2.09531e-266
Unknown Transition	si:ch73-368j24.10	2.23881	8.18865e-216
Unknown Transition	jun	2.5591	7.21676e-202
Unknown Transition	fosb	2.15321	7.44203e-193
Unknown Transition	CR383676.1	1.19879	1.15419e-192
Unknown Transition	socs3a	1.99282	1.41643e-190
Unknown Transition	FP236812.2	1.81957	4.91198e-175
Unknown Transition	ier2b	2.42104	3.3819e-168
Unknown Transition	junba	2.0763	9.93585e-166
Unknown Transition	hsp70.3	2.0147	3.23475e-159
Unknown Transition	dnajb1b	1.90748	1.37384e-153
Unknown Transition	zgc:158463	1.71176	2.82263e-146
Unknown Transition	mt-co2	0.982311	1.30392e-143
Unknown Transition	COX3	1.05271	2.61236e-143
Unknown Transition	CABZ01072614.1	1.81351	9.88289e-143
Unknown Transition	hsp70l	1.88938	1.23579e-141
Unknown Transition	mt-co1	1.02547	5.14476e-135
Unknown Transition	ddit3	1.88541	5.52932e-135
Unknown Transition	btg2	1.68187	8.78071e-135
Unknown Transition	NC-002333.4	1.09871	1.87071e-133
Unknown Transition	NC-002333.17	1.24934	6.2824e-130
Unknown Transition	gadd45ba	1.8955	2.88534e-126
Unknown Transition	ubb	1.89982	7.9955e-122
Unknown Transition	ppp1r15a	1.77539	2.01581e-114
Unknown Transition	si:dkey-23a13.22	1.47338	3.47104e-114
Unknown Transition	CABZ01045617.1	1.85554	1.45111e-107
Unknown Transition	si:ch73-335l21.4	2.49571	7.76774e-106
Unknown Transition	BX901883.3	1.33201	9.74677e-106
Unknown Transition	mt-cyb	1.00274	1.51039e-105
Unknown Transition	rsrp1	1.2413	4.85257e-103
Unknown Transition	ier2a	1.9478	1.01363e-102
Unknown Transition	hsp70.2	1.77635	1.14553e-98
Unknown Transition	ier5	1.82874	3.87979e-98
Unknown Transition	XLOC-001639	1.1531	8.71929e-98
Unknown Transition	ppp1r10	1.84757	3.47647e-97
Unknown Transition	gadd45ga	1.86204	1.52025e-94
Unknown Transition	jund	1.72796	4.7021e-90
Unknown Transition	jdp2b	1.90561	7.58279e-90
Unknown Transition	wu:fb55g09	1.87604	4.804e-89
Unknown Transition	id1	2.27416	7.75239e-88
Unknown Transition	fosl1a	1.95455	4.76912e-87
Unknown Transition	junbb	2.09995	3.92585e-83
Unknown Transition	LOC110439372	1.18883	1.91254e-81
Unknown Transition	hsp70.1	1.71668	1.7007e-79
Unknown Transition	pnrc2	0.961348	4.96717e-79
Unknown Transition	id3	1.64803	5.44435e-77
Unknown Transition	brd2a	1.57542	9.72047e-75
Unknown Transition	XLOC-044191	1.89236	5.58103e-73
Unknown Transition	mycb	1.96661	8.88979e-73
Unknown Transition	xbp1	1.15542	6.34863e-71
Unknown Transition	midn	1.75846	2.09242e-65
Unknown Transition	btg1	0.979655	3.67445e-65
Unknown Transition	hsp90aa1.2	1.41084	2.00596e-63
Unknown Transition	trpm1b	1.33116	8.50284e-61
Unknown Transition	nfkbiaa	1.60103	7.4615e-60
Unknown Transition	ier5l	1.47897	5.08085e-59
Unknown Transition	ND4	0.950937	9.74713e-55
Unknown Transition	dop1a	0.873605	2.37052e-54
Unknown Transition	ATP6	0.975959	2.51693e-54
Unknown Transition	BX005309.1	1.16838	9.25274e-54
Unknown Transition	agr2	0.705001	5.13839e-52
Unknown Transition	RALGDS	1.36449	1.1555e-51
Unknown Transition	si:ch211-196l7.4	1.23926	3.20162e-51
Unknown Transition	LOC103910438	1.46929	2.21598e-49
Unknown Transition	nfkbiab	1.39882	1.78362e-47
Unknown Transition	h2afx1	1.56692	3.69977e-47
Unknown Transition	CABZ01078600.1	1.02855	5.28607e-47
Unknown Transition	zgc:153409	1.43438	1.17114e-44
Unknown Transition	egr1	1.89331	3.55066e-43
Unknown Transition	zgc:194989	1.29143	2.78231e-39
Unknown Transition	phlda2	0.853911	5.08129e-39
Unknown Transition	mych	1.37285	3.68715e-37
Unknown Transition	ND2	0.954902	1.5174e-36
Unknown Transition	zgc:158343	1.07644	3.54425e-36
Unknown Transition	mt-nd5	0.964565	1.24367e-34
Unknown Transition	si:dkey-195m11.8	0.845782	1.29472e-34
Unknown Transition	rn7sk	1.28136	1.22038e-33
Unknown Transition	polr2a	1.71803	6.29187e-33
Unknown Transition	atf4b	0.845944	4.10945e-32
Unknown Transition	mt-nd1	0.806001	4.28968e-28
Unknown Transition	id2a	1.3368	1.80566e-25
Unknown Transition	XLOC-043834	1.19435	2.2855e-24
Unknown Transition	atf3	1.28955	3.06165e-24
Unknown Transition	zgc:162730	1.2395	5.05416e-24
Unknown Transition	socs1a	1.32713	7.19884e-23
Unknown Transition	sox4a	1.62408	2.94677e-22
Unknown Transition	dusp1	1.24366	3.69629e-22
Unknown Transition	pim2	0.969955	1.32784e-21
Unknown Transition	mcl1a	0.857246	1.40112e-21
Unknown Transition	csrnp1b	1.22726	2.97043e-21
Unknown Transition	ddx5	0.858775	5.08685e-21
Unknown Transition	ND3	0.768568	9.69823e-19
Unknown Transition	FP101882.1	0.733311	2.04681e-18
Unknown Transition	pax7a	1.25922	4.30989e-18
Unknown Transition	hspa4a	1.20485	8.52626e-18
Unknown Transition	si:dkey-11f4.14	0.740288	5.06935e-17
Unknown Transition	hnrnpa0b	1.03022	6.50842e-17
Unknown Transition	hist2h2l	1.62855	1.47826e-16
Unknown Transition	zgc:165555.3	1.20399	4.15685e-16
mitfa+aox5hi S phase	chtf18	0.457961	0
mitfa+aox5hi S phase	smc2	0.790838	0
mitfa+aox5hi S phase	pcna	2.69421	0
mitfa+aox5hi S phase	cdk2	0.765498	0
mitfa+aox5hi S phase	dnajc9	1.1732	0
mitfa+aox5hi S phase	msh2	0.626888	0
mitfa+aox5hi S phase	dnph1	0.880183	0
mitfa+aox5hi S phase	hells	1.28058	0
mitfa+aox5hi S phase	prim2	0.521789	0
mitfa+aox5hi S phase	msh6	0.930336	0
mitfa+aox5hi S phase	mcm7	1.70368	0
mitfa+aox5hi S phase	si:ch73-281n10.2	1.46775	0
mitfa+aox5hi S phase	rpa1	0.898825	0
mitfa+aox5hi S phase	rpa2	1.29737	0
mitfa+aox5hi S phase	dscc1	0.461259	0
mitfa+aox5hi S phase	atad2	0.76964	0
mitfa+aox5hi S phase	wdhd1	0.554347	0
mitfa+aox5hi S phase	dut	1.89752	0
mitfa+aox5hi S phase	chtf8	0.588061	0
mitfa+aox5hi S phase	gins2	0.915489	0
mitfa+aox5hi S phase	cdca7b	0.741105	0
mitfa+aox5hi S phase	rpa3	1.66961	0
mitfa+aox5hi S phase	rrm2	1.31245	0
mitfa+aox5hi S phase	CABZ01005379.1	0.902903	0
mitfa+aox5hi S phase	ing5b	0.720795	0
mitfa+aox5hi S phase	lig1	1.50059	0
mitfa+aox5hi S phase	mcm3	1.6441	0
mitfa+aox5hi S phase	dck	0.919154	0
mitfa+aox5hi S phase	rrm1	1.03349	0
mitfa+aox5hi S phase	uhrf1	0.77296	0
mitfa+aox5hi S phase	mcm2	1.82113	0
mitfa+aox5hi S phase	chaf1a	1.60719	0
mitfa+aox5hi S phase	ube2t	0.740075	0
mitfa+aox5hi S phase	prim1	0.500801	0
mitfa+aox5hi S phase	fen1	1.40276	0
mitfa+aox5hi S phase	pola1	0.720561	0
mitfa+aox5hi S phase	mcm4	1.44994	0
mitfa+aox5hi S phase	hirip3	1.0778	0
mitfa+aox5hi S phase	mcm5	1.59873	0
mitfa+aox5hi S phase	si:ch211-156b7.4	1.3832	0
mitfa+aox5hi S phase	asf1ba	0.567588	0
mitfa+aox5hi S phase	dnmt1	1.11922	0
mitfa+aox5hi S phase	dhfr	0.684162	0
mitfa+aox5hi S phase	orc4	0.733746	0
mitfa+aox5hi S phase	mcm6	1.50888	0
mitfa+aox5hi S phase	dtymk	0.530156	0
mitfa+aox5hi S phase	nasp	1.45405	0
mitfa+aox5hi S phase	orc6	0.535053	0
mitfa+aox5hi S phase	tyms	1.0632	0
mitfa+aox5hi S phase	znf367	0.616219	0
mitfa+aox5hi S phase	pola2	0.565499	0
mitfa+aox5hi S phase	gins4	0.414731	0
mitfa+aox5hi S phase	tubb2b	2.18354	0
mitfa+aox5hi S phase	cdca7a	0.907129	0
mitfa+aox5hi S phase	chaf1b	0.474989	0
mitfa+aox5hi S phase	tk1	0.459481	0
mitfa+aox5hi S phase	zgc:110540	0.56196	0
mitfa+aox5hi S phase	cks1b	0.702282	2.25313e-302
mitfa+aox5hi S phase	cdkn1a	1.38146	6.18153e-302
mitfa+aox5hi S phase	mybl2b	0.388948	1.37334e-299
mitfa+aox5hi S phase	cenps	0.707578	7.83377e-299
mitfa+aox5hi S phase	atad5a	0.472836	1.02561e-296
mitfa+aox5hi S phase	rad51	0.639237	3.74725e-296
mitfa+aox5hi S phase	rfc4	0.722309	8.61394e-295
mitfa+aox5hi S phase	pold1	0.540474	4.0848e-285
mitfa+aox5hi S phase	si:dkey-6i22.5	0.601187	5.35965e-285
mitfa+aox5hi S phase	tuba8l4	1.41824	1.60112e-284
mitfa+aox5hi S phase	gins3	0.293033	1.57209e-279
mitfa+aox5hi S phase	slbp	0.79234	1.79164e-278
mitfa+aox5hi S phase	orc1	0.320537	1.99558e-270
mitfa+aox5hi S phase	cdc6	0.384122	2.08958e-269
mitfa+aox5hi S phase	rnaseh2a	0.727807	2.51691e-261
mitfa+aox5hi S phase	esco2	0.415654	2.25636e-256
mitfa+aox5hi S phase	si:dkey-185e18.7	0.406229	3.35836e-247
mitfa+aox5hi S phase	kif15	0.418875	1.91229e-241
mitfa+aox5hi S phase	pole4	0.878911	3.61992e-240
mitfa+aox5hi S phase	dctd	0.329662	2.30138e-239
mitfa+aox5hi S phase	tuba8l3	1.35276	9.42759e-239
mitfa+aox5hi S phase	haus1	0.426255	1.32647e-238
mitfa+aox5hi S phase	psmc3ip	0.345999	3.8123e-238
mitfa+aox5hi S phase	nsd2	0.475331	5.73445e-235
mitfa+aox5hi S phase	cenpx	0.934847	2.00116e-232
mitfa+aox5hi S phase	fancd2	0.302497	1.18776e-231
mitfa+aox5hi S phase	rb1	0.480265	1.4668e-230
mitfa+aox5hi S phase	nutf2l	1.07217	3.30378e-226
mitfa+aox5hi S phase	cenph	0.361033	7.3403e-222
mitfa+aox5hi S phase	rfc2	0.526582	4.31087e-220
mitfa+aox5hi S phase	hat1	0.77889	1.24848e-218
mitfa+aox5hi S phase	chek2	0.37729	3.34188e-218
mitfa+aox5hi S phase	rbbp4	1.04376	1.36216e-216
mitfa+aox5hi S phase	pole2	0.273236	3.11349e-203
mitfa+aox5hi S phase	rfc3	0.661665	1.54441e-200
mitfa+aox5hi S phase	selenoh	1.28585	2.93537e-196
mitfa+aox5hi S phase	aurkb	0.474671	4.62999e-196
mitfa+aox5hi S phase	cenpk	0.416751	1.35122e-195
mitfa+aox5hi S phase	haus4	0.291423	1.44648e-195
mitfa+aox5hi S phase	cdca5	0.385568	1.97362e-194
mitfa+aox5hi S phase	ssrp1a	0.835701	5.67514e-192
mitfa+aox5hi S phase	ppiab	0.827355	5.42444e-190
mitfa+aox5hi S phase	HUS1B	0.38345	3.19696e-189
mitfa+aox5hi G2/M phase	si:ch211-266i6.3	2.64731	0
mitfa+aox5hi G2/M phase	tacc3	1.03252	0
mitfa+aox5hi G2/M phase	cenpf	1.35563	0
mitfa+aox5hi G2/M phase	stmn1a	2.05408	0
mitfa+aox5hi G2/M phase	kpna2	1.81205	0
mitfa+aox5hi G2/M phase	ube2c	2.12434	0
mitfa+aox5hi G2/M phase	spc25	0.860489	0
mitfa+aox5hi G2/M phase	knstrn	1.02194	0
mitfa+aox5hi G2/M phase	pttg1	1.39977	0
mitfa+aox5hi G2/M phase	cdk1	2.02714	0
mitfa+aox5hi G2/M phase	aspm	1.19536	0
mitfa+aox5hi G2/M phase	prc1b	0.952582	0
mitfa+aox5hi G2/M phase	kif11	1.04589	0
mitfa+aox5hi G2/M phase	nusap1	1.29057	2.56e-301
mitfa+aox5hi G2/M phase	anln	0.955695	4.1e-293
mitfa+aox5hi G2/M phase	si:dkey-7j14.5	0.546322	1.03e-291
mitfa+aox5hi G2/M phase	birc5a	1.20213	5.9e-287
mitfa+aox5hi G2/M phase	prr11	0.692527	1.03e-262
mitfa+aox5hi G2/M phase	cdca8	0.963996	2.05e-257
mitfa+aox5hi G2/M phase	ccnb1	1.1513	2.91e-256
mitfa+aox5hi G2/M phase	cenpx	1.67247	4.28e-252
mitfa+aox5hi G2/M phase	cenpe	0.749948	6.35e-232
mitfa+aox5hi G2/M phase	si:dkey-6i22.5	0.653081	1.28e-229
mitfa+aox5hi G2/M phase	mad2l1	1.01359	7.99e-229
mitfa+aox5hi G2/M phase	zgc:194627	1.54414	3.71e-224
mitfa+aox5hi G2/M phase	si:dkey-148h10.5	0.382618	3.83e-216
mitfa+aox5hi G2/M phase	si:ch211-69g19.2	1.18299	3.01e-205
mitfa+aox5hi G2/M phase	kmt5ab	0.479027	2.7e-202
mitfa+aox5hi G2/M phase	si:dkey-25o16.4	0.486148	2.39e-194
mitfa+aox5hi G2/M phase	cdkn3	0.563767	6.02e-192
mitfa+aox5hi G2/M phase	pane1	0.816073	8.62e-186
mitfa+aox5hi G2/M phase	plk1	0.86147	5.1e-184
mitfa+aox5hi G2/M phase	top2a	1.12372	1.2e-182
mitfa+aox5hi G2/M phase	dut	1.37356	4.02e-177
mitfa+aox5hi G2/M phase	cenpw	0.622117	1.14e-169
mitfa+aox5hi G2/M phase	cdc20	0.436565	3.69e-166
mitfa+aox5hi G2/M phase	si:ch211-288g17.3	2.32424	3.84e-164
mitfa+aox5hi G2/M phase	tpx2	1.08499	9.69e-163
mitfa+aox5hi G2/M phase	cks1b	0.916727	9.79e-163
mitfa+aox5hi G2/M phase	kif20a	0.351709	3.06e-161
mitfa+aox5hi G2/M phase	hmgn2	3.59932	6.48e-157
mitfa+aox5hi G2/M phase	si:ch73-281n10.2	2.91491	2.6e-154
mitfa+aox5hi G2/M phase	ccnb3	0.559902	1.44e-152
mitfa+aox5hi G2/M phase	ttk	0.998479	4.4e-148
mitfa+aox5hi G2/M phase	shcbp1	0.618974	7.12e-147
mitfa+aox5hi G2/M phase	ccna2	0.678802	3.44e-145
mitfa+aox5hi G2/M phase	h2afvb	2.47907	2.35e-144
mitfa+aox5hi G2/M phase	si:ch73-1a9.3	2.44689	1.51e-131
mitfa+aox5hi G2/M phase	dnph1	0.749605	6.72e-129
mitfa+aox5hi G2/M phase	mtfr2	0.38309	2.65e-128
mitfa+aox5hi G2/M phase	prxl2b	0.564953	1.49e-120
mitfa+aox5hi G2/M phase	smc2	0.860669	5.47e-119
mitfa+aox5hi G2/M phase	mastl	0.381854	1.9e-117
mitfa+aox5hi G2/M phase	si:ch211-126c2.4	0.606367	6.68e-116
mitfa+aox5hi G2/M phase	hmgb2a	2.5191	2.72e-112
mitfa+aox5hi G2/M phase	cenpp	0.366384	2.05e-110
mitfa+aox5hi G2/M phase	g2e3	0.308238	1.34e-106
mitfa+aox5hi G2/M phase	lmnb1	0.878948	2.15e-105
mitfa+aox5hi G2/M phase	tp53inp2	2.03038	8.5e-105
mitfa+aox5hi G2/M phase	kif2c	0.382708	3.96e-103
mitfa+aox5hi G2/M phase	ecrg4a	0.677174	1.66e-102
mitfa+aox5hi G2/M phase	ska1	0.452211	9.29e-100
mitfa+aox5hi G2/M phase	kifc1	0.824915	4.61e-99
mitfa+aox5hi G2/M phase	iqgap3	0.598836	3.26e-94
mitfa+aox5hi G2/M phase	cdc25b	0.76603	2.88e-93
mitfa+aox5hi G2/M phase	rpa2	0.849325	4.07e-92
mitfa+aox5hi G2/M phase	si:ch211-156b7.4	0.799076	7.25e-91
mitfa+aox5hi G2/M phase	spdl1	0.35412	5.2e-90
mitfa+aox5hi G2/M phase	ncaph2	0.293645	1.57e-89
mitfa+aox5hi G2/M phase	ncapd2	0.496451	1.49e-85
mitfa+aox5hi G2/M phase	hmgb2b	1.88646	4.27e-84
mitfa+aox5hi G2/M phase	psat1	0.51112	5.99e-84
mitfa+aox5hi G2/M phase	nucks1a	1.4063	6.78e-84
mitfa+aox5hi G2/M phase	cks2	0.471018	3.49e-83
mitfa+aox5hi G2/M phase	spc24	0.326984	6.46e-78
mitfa+aox5hi G2/M phase	tma7	1.46493	5.68e-76
mitfa+aox5hi G2/M phase	calm3b	1.56246	4.2e-74
mitfa+aox5hi G2/M phase	gra	0.555086	9.85e-74
mitfa+aox5hi G2/M phase	mki67	0.816898	1.13e-73
mitfa+aox5hi G2/M phase	lmnb2	1.01618	2.38e-73
mitfa+aox5hi G2/M phase	cdca7b	0.334672	7.73e-73
mitfa+aox5hi G2/M phase	cenps	0.619091	1.86e-72
mitfa+aox5hi G2/M phase	actb1	1.34685	5.51e-72
mitfa+aox5hi G2/M phase	oaz2b	0.782398	5.74e-71
mitfa+aox5hi G2/M phase	lin52	0.7368	8.8e-71
mitfa+aox5hi G2/M phase	myl6	1.34752	2.18e-68
mitfa+aox5hi G2/M phase	tbcelb	0.642194	1.89e-67
mitfa+aox5hi G2/M phase	si:ch211-11k18.4	0.544844	4.1e-66
mitfa+aox5hi G2/M phase	tuba1b	1.46666	4.83e-65
mitfa+aox5hi G2/M phase	tuba1a	1.05694	9.36e-64
mitfa+aox5hi G2/M phase	dck	0.480191	1.25e-63
mitfa+aox5hi G2/M phase	ncapg	0.534699	1.31e-63
mitfa+aox5hi G2/M phase	cirbpa	1.20237	6.42e-62
mitfa+aox5hi G2/M phase	zgc:56493	1.07268	4.67e-60
mitfa+aox5hi G2/M phase	si:dkey-30c15.10	0.577984	7.11e-60
mitfa+aox5hi G2/M phase	pbk	0.467428	2.45e-59
mitfa+aox5hi G2/M phase	ahcy	0.953383	4.22e-58
mitfa+aox5hi G2/M phase	h3f3a	1.68634	5.41e-58
mitfa+aox5hi G2/M phase	hint1	1.25312	5.63e-58
mitfa+aox5hi G2/M phase	zswim7	0.312521	3.09e-57
mitfa+aox5hi S adj	uraha	1.00475	0
mitfa+aox5hi S adj	CABZ01021592.1	1.19007	0
mitfa+aox5hi S adj	prdx5	0.909772	0
mitfa+aox5hi S adj	krt18b	0.765279	0
mitfa+aox5hi S adj	thy1	0.881767	2.74874e-229
mitfa+aox5hi S adj	gstm.3	1.27414	7.33343e-221
mitfa+aox5hi S adj	si:dkey-73n8.3	0.861587	6.45303e-206
mitfa+aox5hi S adj	tmsb4x	0.373624	5.87954e-187
mitfa+aox5hi S adj	tmsb1	0.970262	3.97886e-157
mitfa+aox5hi S adj	plin6	0.901522	6.22714e-146
mitfa+aox5hi S adj	ppdpfb	0.870236	1.06259e-140
mitfa+aox5hi S adj	bco1	0.973556	1.54604e-117
mitfa+aox5hi S adj	krt8	0.421975	4.25551e-103
mitfa+aox5hi S adj	actb2	0.377516	2.14372e-102
mitfa+aox5hi S adj	si:ch73-389b16.1	0.671123	5.32595e-98
mitfa+aox5hi S adj	gch2	0.755085	2.43594e-85
mitfa+aox5hi S adj	iah1	1.00481	6.92549e-84
mitfa+aox5hi S adj	tmem50a	0.25433	7.0368e-84
mitfa+aox5hi S adj	sec62	0.252974	4.1082e-83
mitfa+aox5hi S adj	aox5	1.04747	2.87689e-81
mitfa+aox5hi S adj	pabpc1a	0.62549	1.77112e-80
mitfa+aox5hi S adj	fam32a	0.271544	1.01516e-78
mitfa+aox5hi S adj	chd3	0.295725	1.49835e-78
mitfa+aox5hi S adj	sparc	0.804757	2.46577e-77
mitfa+aox5hi S adj	pabpc1b	1.13833	4.98075e-77
mitfa+aox5hi S adj	smdt1b	0.263814	9.66883e-75
mitfa+aox5hi S adj	mdh2	0.268603	4.24606e-74
mitfa+aox5hi S adj	si:dkey-204f11.64	0.590618	1.13386e-73
mitfa+aox5hi S adj	gng5	0.259048	4.19515e-73
mitfa+aox5hi S adj	bscl2l	0.616916	4.52465e-73
mitfa+aox5hi S adj	paip2b	0.275887	8.76399e-72
mitfa+aox5hi S adj	chmp2a	0.326592	2.17851e-71
mitfa+aox5hi S adj	dnaja2a	0.283712	3.94101e-71
mitfa+aox5hi S adj	fundc2	0.261884	6.42026e-71
mitfa+aox5hi S adj	gstp1	1.01242	1.10028e-69
mitfa+aox5hi S adj	atp2b2	0.270354	1.00856e-68
mitfa+aox5hi S adj	tax1bp1b	0.282217	2.32955e-67
mitfa+aox5hi S adj	ube2na	0.251854	2.41702e-67
mitfa+aox5hi S adj	si:dkey-276j7.1	0.282178	4.02037e-67
mitfa+aox5hi S adj	c1qbp	0.254269	4.37451e-67
mitfa+aox5hi S adj	ndufa11	0.269928	6.48788e-67
mitfa+aox5hi S adj	golga7	0.29078	7.03175e-67
mitfa+aox5hi S adj	bcas2	0.267031	7.3489e-67
mitfa+aox5hi S adj	ska2	0.265183	1.59816e-66
mitfa+aox5hi S adj	vdac1	0.283938	1.02274e-65
mitfa+aox5hi S adj	ndufb2	0.277517	1.89959e-65
mitfa+aox5hi S adj	ap2m1a	0.268992	3.83958e-65
mitfa+aox5hi S adj	sdhc	0.277648	5.1812e-65
mitfa+aox5hi S adj	ndfip1l	0.260665	3.18773e-64
mitfa+aox5hi S adj	rab5c	0.303954	5.61424e-64
mitfa+aox5hi S adj	cope	0.265088	9.00828e-64
mitfa+aox5hi S adj	eif3s10	0.26915	1.20399e-63
mitfa+aox5hi S adj	pin1	0.29361	1.5651e-63
mitfa+aox5hi S adj	clic4	0.278936	1.67293e-63
mitfa+aox5hi S adj	si:zfos-1192g2.3	0.280163	3.16982e-63
mitfa+aox5hi S adj	dazap2	0.264492	5.52636e-63
mitfa+aox5hi S adj	pdcd5	0.288189	8.66523e-63
mitfa+aox5hi S adj	ndufc2	0.293892	1.01775e-62
mitfa+aox5hi S adj	mcts1	0.302374	1.28934e-62
mitfa+aox5hi S adj	fam49a	0.264934	1.76326e-62
mitfa+aox5hi S adj	bcap31	0.281542	1.97469e-62
mitfa+aox5hi S adj	wdr83os	0.326511	2.05439e-62
mitfa+aox5hi S adj	ndufa2	0.278477	2.69311e-62
mitfa+aox5hi S adj	eif3c	0.275747	4.36602e-62
mitfa+aox5hi S adj	spg21	0.302093	8.45272e-62
mitfa+aox5hi S adj	ube2l3a	0.270575	8.67658e-62
mitfa+aox5hi S adj	eif5b	0.317029	8.80363e-62
mitfa+aox5hi S adj	capzb	0.276892	1.08979e-61
mitfa+aox5hi S adj	oacyl	0.952568	3.83497e-61
mitfa+aox5hi S adj	rhoaa	0.303237	5.60394e-61
mitfa+aox5hi S adj	pcbp2	0.309549	1.08032e-60
mitfa+aox5hi S adj	usp9	0.276655	1.84326e-60
mitfa+aox5hi S adj	ube2v1	0.346183	2.15196e-60
mitfa+aox5hi S adj	si:ch211-235e9.6	0.295549	2.54963e-60
mitfa+aox5hi S adj	si:rp71-36a1.3	0.279804	6.31435e-59
mitfa+aox5hi S adj	ppp1cbl	0.296526	7.48921e-59
mitfa+aox5hi S adj	arf2a	0.261463	1.12274e-58
mitfa+aox5hi S adj	ndufa12	0.299161	1.32211e-58
mitfa+aox5hi S adj	mpc1	0.269973	1.80712e-58
mitfa+aox5hi S adj	chmp5b	0.364268	1.93712e-58
mitfa+aox5hi S adj	elocb	0.329968	2.32064e-58
mitfa+aox5hi S adj	vcp	0.279595	3.11565e-58
mitfa+aox5hi S adj	smim15	0.25213	5.02822e-58
mitfa+aox5hi S adj	commd8	0.325292	7.58818e-58
mitfa+aox5hi S adj	stx12	0.305635	8.23748e-58
mitfa+aox5hi S adj	s100a10b	0.329977	1.72005e-57
mitfa+aox5hi S adj	tax1bp3	0.373021	2.09174e-57
mitfa+aox5hi S adj	atp6v0ca	0.261806	4.59199e-57
mitfa+aox5hi S adj	zgc:100918	0.300622	4.74717e-57
mitfa+aox5hi S adj	ube2d2	0.289199	5.93701e-57
mitfa+aox5hi S adj	rsu1	0.281965	6.76678e-57
mitfa+aox5hi S adj	cops8	0.250525	7.60381e-57
mitfa+aox5hi S adj	pxk	0.294329	1.07285e-56
mitfa+aox5hi S adj	zgc:165573	0.27331	1.33006e-56
mitfa+aox5hi S adj	eno3	0.256884	4.96266e-56
mitfa+aox5hi S adj	mon1ba	0.256579	5.15111e-56
mitfa+aox5hi S adj	rap2c	0.266831	1.02924e-55
mitfa+aox5hi S adj	kdelr2b	0.279028	1.52659e-55
mitfa+aox5hi S adj	acadm	0.278344	1.72541e-55
mitfa+aox5hi S adj	nedd8	0.253935	2.08765e-55
mitfa+aox5hi G2/M adj	si:dkey-200l5.4	1.46407	0
mitfa+aox5hi G2/M adj	slc22a7a	1.0891	0
mitfa+aox5hi G2/M adj	si:zfos-1069f5.1	1.10373	0
mitfa+aox5hi G2/M adj	tmsb1	1.13355	0
mitfa+aox5hi G2/M adj	bco2b	1.57199	0
mitfa+aox5hi G2/M adj	gch1	1.47126	0
mitfa+aox5hi G2/M adj	bhlhe41	1.14765	0
mitfa+aox5hi G2/M adj	si:ch211-81a5.8	1.50673	0
mitfa+aox5hi G2/M adj	CABZ01021592.1	0.974772	0
mitfa+aox5hi G2/M adj	chst2a	1.27988	0
mitfa+aox5hi G2/M adj	rcan2	1.00925	0
mitfa+aox5hi G2/M adj	oacyl	1.98635	0
mitfa+aox5hi G2/M adj	gstt1b	1.30063	0
mitfa+aox5hi G2/M adj	hsd11b1la	1.27637	0
mitfa+aox5hi G2/M adj	tm4sf18	1.49024	0
mitfa+aox5hi G2/M adj	sgk3	1.0929	0
mitfa+aox5hi G2/M adj	cnn3a	1.0736	0
mitfa+aox5hi G2/M adj	kitlga	1.38703	0
mitfa+aox5hi G2/M adj	dusp6	1.13381	0
mitfa+aox5hi G2/M adj	slc41a2a	0.878535	0
mitfa+aox5hi G2/M adj	thy1	1.41462	0
mitfa+aox5hi G2/M adj	aqp3a	1.16897	0
mitfa+aox5hi G2/M adj	cyp27c1	1.18058	0
mitfa+aox5hi G2/M adj	gstm.3	1.28811	0
mitfa+aox5hi G2/M adj	si:ch211-251b21.1	1.54797	0
mitfa+aox5hi G2/M adj	rasd1	1.08799	8.82666e-293
mitfa+aox5hi G2/M adj	lipea	1.04292	1.64388e-289
mitfa+aox5hi G2/M adj	si:ch211-286o17.1	0.988346	1.75997e-285
mitfa+aox5hi G2/M adj	ngfrb	0.987143	2.7719e-284
mitfa+aox5hi G2/M adj	gal3st2	0.96459	8.69943e-282
mitfa+aox5hi G2/M adj	usp2b	1.11745	8.758e-280
mitfa+aox5hi G2/M adj	adrb2a	0.868339	6.97711e-277
mitfa+aox5hi G2/M adj	slc35f1	0.595147	1.289e-274
mitfa+aox5hi G2/M adj	pax7b	1.02718	9.13482e-272
mitfa+aox5hi G2/M adj	rasef	0.934329	2.0459e-270
mitfa+aox5hi G2/M adj	iah1	0.974752	1.32808e-267
mitfa+aox5hi G2/M adj	pabpc1b	0.898216	6.71022e-254
mitfa+aox5hi G2/M adj	foxd3	1.20367	1.21124e-252
mitfa+aox5hi G2/M adj	fstl1a	0.880401	3.861e-251
mitfa+aox5hi G2/M adj	add3b	0.816613	8.76552e-249
mitfa+aox5hi G2/M adj	olfml2a	0.623989	6.80723e-246
mitfa+aox5hi G2/M adj	si:dkey-73n8.3	0.782837	1.78685e-245
mitfa+aox5hi G2/M adj	arhgef33	0.923801	2.69375e-244
mitfa+aox5hi G2/M adj	enpp6	0.522371	1.6595e-242
mitfa+aox5hi G2/M adj	si:ch73-389b16.1	0.91463	1.2834e-241
mitfa+aox5hi G2/M adj	cx39.4	0.942097	1.60968e-239
mitfa+aox5hi G2/M adj	nrp2b	0.852288	6.6319e-237
mitfa+aox5hi G2/M adj	plk2b	0.928008	3.33063e-236
mitfa+aox5hi G2/M adj	rgs3a	1.15709	3.01238e-235
mitfa+aox5hi G2/M adj	syt11a	0.823733	7.68959e-233
mitfa+aox5hi G2/M adj	litaf	0.879567	9.53722e-232
mitfa+aox5hi G2/M adj	agrn	0.918642	2.58284e-230
mitfa+aox5hi G2/M adj	ivns1abpa	0.888967	1.77356e-228
mitfa+aox5hi G2/M adj	CABZ01080702.1	0.835572	1.01638e-226
mitfa+aox5hi G2/M adj	sparc	0.657259	2.16691e-225
mitfa+aox5hi G2/M adj	agmo	0.778916	2.39415e-224
mitfa+aox5hi G2/M adj	ppdpfb	0.775062	2.08832e-217
mitfa+aox5hi G2/M adj	pnp5a	0.857131	3.05216e-214
mitfa+aox5hi G2/M adj	scarb1	0.801881	5.01483e-214
mitfa+aox5hi G2/M adj	adrb1	0.586074	3.6384e-212
mitfa+aox5hi G2/M adj	uraha	0.725816	3.69719e-211
mitfa+aox5hi G2/M adj	csf1ra	0.79004	7.6807e-211
mitfa+aox5hi G2/M adj	kcnma1a	0.481331	4.76683e-206
mitfa+aox5hi G2/M adj	pcdh10a	0.852412	2.8723e-205
mitfa+aox5hi G2/M adj	tp53inp2	0.781451	1.63426e-204
mitfa+aox5hi G2/M adj	sh3bp5b	0.710013	4.92001e-200
mitfa+aox5hi G2/M adj	si:dkey-204f11.64	0.634394	7.29988e-200
mitfa+aox5hi G2/M adj	lrrn1	0.458771	9.42855e-196
mitfa+aox5hi G2/M adj	zgc:63831	0.786887	3.85065e-194
mitfa+aox5hi G2/M adj	si:ch211-210c8.7	0.789704	6.72182e-192
mitfa+aox5hi G2/M adj	tnfsf10l3	0.548475	9.68063e-192
mitfa+aox5hi G2/M adj	BX276128.1	0.462382	3.2578e-191
mitfa+aox5hi G2/M adj	ctgfa	0.773773	1.19024e-190
mitfa+aox5hi G2/M adj	si:zfos-943e10.1	0.811754	5.80702e-190
mitfa+aox5hi G2/M adj	emilin1b	0.665501	1.56182e-184
mitfa+aox5hi G2/M adj	si:dkey-238c7.16	0.721482	2.69984e-183
mitfa+aox5hi G2/M adj	si:ch211-214p13.9	0.673452	4.01285e-183
mitfa+aox5hi G2/M adj	pld1a	0.734139	2.01537e-181
mitfa+aox5hi G2/M adj	sdc4	0.751519	2.63612e-180
mitfa+aox5hi G2/M adj	pnp4a	0.771506	7.7199e-180
mitfa+aox5hi G2/M adj	rbp4l	1.02966	2.88262e-179
mitfa+aox5hi G2/M adj	cyb561a3b	0.644103	2.33616e-178
mitfa+aox5hi G2/M adj	tgm1l1	0.694838	4.64226e-178
mitfa+aox5hi G2/M adj	epoa	0.810873	5.83003e-177
mitfa+aox5hi G2/M adj	dusp1	0.835211	1.66933e-176
mitfa+aox5hi G2/M adj	si:ch211-137a8.4	0.783522	3.70047e-176
mitfa+aox5hi G2/M adj	adam17a	0.734233	1.84218e-175
mitfa+aox5hi G2/M adj	ptprga	0.686324	7.74004e-175
mitfa+aox5hi G2/M adj	desi1b	0.724051	5.42394e-174
mitfa+aox5hi G2/M adj	mlphb	0.691855	2.9602e-173
mitfa+aox5hi G2/M adj	CSDC2-1-of-many	1.0168	5.86901e-173
mitfa+aox5hi G2/M adj	ehd2b	0.69453	1.75804e-172
mitfa+aox5hi G2/M adj	ank3b	0.839514	3.87605e-171
mitfa+aox5hi G2/M adj	sox5	0.822417	6.14568e-171
mitfa+aox5hi G2/M adj	sigmar1	0.738361	1.26825e-169
mitfa+aox5hi G2/M adj	col4a1	0.765333	5.09098e-169
mitfa+aox5hi G2/M adj	gstm.1	0.661229	8.08246e-168
mitfa+aox5hi G2/M adj	trpv1	0.688421	2.7449e-166
mitfa+aox5hi G2/M adj	gsna	0.617661	2.99948e-166
mitfa+aox5hi G2/M adj	tmem235	0.649919	3.98738e-164
mitfa+aox5hi 5	uchl1	1.36484	0
mitfa+aox5hi 5	neurl1aa	0.84245	0
mitfa+aox5hi 5	si:dkey-200l5.4	1.16034	0
mitfa+aox5hi 5	efnb3a	0.822235	0
mitfa+aox5hi 5	slc22a7a	1.5842	0
mitfa+aox5hi 5	pax7a	1.90574	0
mitfa+aox5hi 5	XLOC-003678	1.04311	0
mitfa+aox5hi 5	map1lc3c	0.526933	0
mitfa+aox5hi 5	chp2	1.04556	0
mitfa+aox5hi 5	dlc	1.83596	0
mitfa+aox5hi 5	bco2b	1.67698	0
mitfa+aox5hi 5	clec3ba	1.30879	0
mitfa+aox5hi 5	plin6	1.24683	0
mitfa+aox5hi 5	rbp5	1.65327	0
mitfa+aox5hi 5	cmtm6	1.43482	0
mitfa+aox5hi 5	alkal2b	0.379729	0
mitfa+aox5hi 5	si:dkey-238c7.16	1.15462	0
mitfa+aox5hi 5	eepd1	0.763132	0
mitfa+aox5hi 5	mc5ra	1.34663	0
mitfa+aox5hi 5	cx39.4	1.12511	0
mitfa+aox5hi 5	asip2b	3.60522	0
mitfa+aox5hi 5	ap1s3b	0.424512	0
mitfa+aox5hi 5	si:ch211-165b10.3	1.20694	0
mitfa+aox5hi 5	kita	2.85044	0
mitfa+aox5hi 5	opn5	1.27278	0
mitfa+aox5hi 5	oacyl	1.34342	0
mitfa+aox5hi 5	tmem179b	0.480242	0
mitfa+aox5hi 5	gfpt2	1.04387	0
mitfa+aox5hi 5	si:zfos-943e10.1	1.63337	0
mitfa+aox5hi 5	tsc22d2	1.82052	0
mitfa+aox5hi 5	CT737162.3	1.23935	0
mitfa+aox5hi 5	exoc3l1	1.21504	0
mitfa+aox5hi 5	nav2b	0.981476	0
mitfa+aox5hi 5	lrmp	0.821687	0
mitfa+aox5hi 5	tbx2a	0.498486	0
mitfa+aox5hi 5	notch1b	0.4692	0
mitfa+aox5hi 5	sox21a	0.584858	0
mitfa+aox5hi 5	inpp4ab	0.82949	0
mitfa+aox5hi 5	si:ch73-389b16.1	1.3654	0
mitfa+aox5hi 5	her6	1.17084	0
mitfa+aox5hi 5	si:ch211-286o17.1	1.35048	0
mitfa+aox5hi 5	qsox1	1.24303	0
mitfa+aox5hi 5	soat1	0.725088	0
mitfa+aox5hi 5	gstm.3	1.58521	0
mitfa+aox5hi 5	sema3bl	1.6774	0
mitfa+aox5hi 5	rasef	1.26113	0
mitfa+aox5hi 5	zgc:113337	2.48043	0
mitfa+aox5hi 5	aqp3a	1.2744	1.44017e-303
mitfa+aox5hi 5	si:zfos-1069f5.1	1.2178	3.03014e-302
mitfa+aox5hi 5	zgc:110789	1.01828	1.9909e-300
mitfa+aox5hi 5	slc7a1	0.966709	3.87074e-299
mitfa+aox5hi 5	pcdh10a	1.18013	1.24526e-298
mitfa+aox5hi 5	scarb1	1.24619	1.01209e-297
mitfa+aox5hi 5	spock3	1.07681	1.11299e-295
mitfa+aox5hi 5	pmp22b	1.60009	5.7737e-293
mitfa+aox5hi 5	zdhhc2	0.708735	2.03431e-290
mitfa+aox5hi 5	CABZ01030033.1	1.50676	1.51901e-288
mitfa+aox5hi 5	tnfrsf21	0.930896	1.29638e-286
mitfa+aox5hi 5	mkxb	0.885469	2.88177e-285
mitfa+aox5hi 5	cygb1	0.984362	6.10824e-285
mitfa+aox5hi 5	fxyd1	1.23172	1.23336e-272
mitfa+aox5hi 5	bscl2l	1.11958	3.129e-272
mitfa+aox5hi 5	tln2a	0.411082	3.57364e-272
mitfa+aox5hi 5	serpine1	1.28126	6.46938e-272
mitfa+aox5hi 5	mamdc2a	0.310812	6.60138e-264
mitfa+aox5hi 5	slc2a11b	1.12234	7.78553e-264
mitfa+aox5hi 5	cax1	0.9946	2.87725e-262
mitfa+aox5hi 5	cyp2ad3	0.740443	1.68771e-261
mitfa+aox5hi 5	arhgef33	1.16688	1.06266e-260
mitfa+aox5hi 5	LOC566587	1.06918	1.87088e-260
mitfa+aox5hi 5	phyhd1	0.973306	1.18215e-259
mitfa+aox5hi 5	map1sa	1.02984	1.2762e-259
mitfa+aox5hi 5	pttg1ipb	1.15286	1.40531e-255
mitfa+aox5hi 5	prkar1b	0.445142	1.49488e-255
mitfa+aox5hi 5	si:dkey-73n8.3	1.11683	9.91025e-254
mitfa+aox5hi 5	tmem243a	1.05009	1.15471e-249
mitfa+aox5hi 5	usp2b	1.24924	9.12278e-249
mitfa+aox5hi 5	adam17a	0.913839	4.0164e-245
mitfa+aox5hi 5	uraha	1.01225	3.63883e-242
mitfa+aox5hi 5	ctnnd2a	0.590195	1.58356e-236
mitfa+aox5hi 5	col6a3	1.11624	7.29276e-232
mitfa+aox5hi 5	aplp1	0.69097	3.8428e-231
mitfa+aox5hi 5	gja5b	0.949481	7.96278e-229
mitfa+aox5hi 5	st8sia6	0.944308	1.42024e-227
mitfa+aox5hi 5	nceh1a	0.305592	1.95412e-226
mitfa+aox5hi 5	acsl1a	0.998571	3.18401e-226
mitfa+aox5hi 5	nrgna	0.895059	4.39388e-226
mitfa+aox5hi 5	mlpha	0.930479	4.97874e-225
mitfa+aox5hi 5	gch1	0.864068	6.33936e-225
mitfa+aox5hi 5	mlphb	0.947472	9.08026e-225
mitfa+aox5hi 5	npdc1a	0.612059	1.20005e-223
mitfa+aox5hi 5	csf1ra	0.873077	8.11862e-223
mitfa+aox5hi 5	bhlhe41	0.945881	5.41594e-221
mitfa+aox5hi 5	plcd1a	0.510411	9.23776e-221
mitfa+aox5hi 5	anxa2a	1.23728	5.82872e-219
mitfa+aox5hi 5	tjp1a	0.896171	1.92337e-218
mitfa+aox5hi 5	slc20a2	0.918928	4.43505e-216
mitfa+aox5hi 5	gstm.1	0.976063	1.00287e-213
mitfa+aox5hi 5	BX510657.1	0.300313	3.22058e-213
mitfa+aox5hi 5	rab34b	0.863409	7.31468e-213
mitfa+aox5hi 6	plin6	1.60806	0
mitfa+aox5hi 6	asip2b	2.73757	0
mitfa+aox5hi 6	CABZ01030033.1	2.33937	0
mitfa+aox5hi 6	zgc:113337	2.73076	0
mitfa+aox5hi 6	CABZ01021592.1	1.08811	4.43631e-295
mitfa+aox5hi 6	bscl2l	1.544	1.00081e-285
mitfa+aox5hi 6	dgat2	1.97654	2.8114e-275
mitfa+aox5hi 6	tsc22d2	1.94947	1.3345e-266
mitfa+aox5hi 6	si:ch73-389b16.1	1.36374	1.76087e-262
mitfa+aox5hi 6	gstm.3	1.57566	9.10962e-261
mitfa+aox5hi 6	uraha	1.18026	2.16349e-229
mitfa+aox5hi 6	si:dkey-73n8.3	1.37555	1.52689e-225
mitfa+aox5hi 6	kita	1.93272	2.11136e-223
mitfa+aox5hi 6	sema3bl	1.29035	7.66539e-220
mitfa+aox5hi 6	anxa2a	1.35476	2.80537e-207
mitfa+aox5hi 6	zgc:110339	2.16656	5.90864e-183
mitfa+aox5hi 6	arl6ip1	1.45472	1.33272e-181
mitfa+aox5hi 6	si:ch211-165b10.3	1.55435	1.25668e-163
mitfa+aox5hi 6	cmtm6	1.47501	5.13828e-160
mitfa+aox5hi 6	aplp1	1.02914	1.43262e-156
mitfa+aox5hi 6	CT737162.3	1.55094	3.48921e-149
mitfa+aox5hi 6	spra	1.7509	4.87903e-147
mitfa+aox5hi 6	XLOC-014193	0.848068	3.80058e-142
mitfa+aox5hi 6	slc22a7a	1.13034	9.35924e-142
mitfa+aox5hi 6	aqp3a	0.842244	8.70568e-141
mitfa+aox5hi 6	mkxb	1.39318	1.44979e-139
mitfa+aox5hi 6	s100a10b	0.854595	4.91417e-133
mitfa+aox5hi 6	uchl1	1.5463	2.20064e-129
mitfa+aox5hi 6	ssr3	1.36538	3.85592e-127
mitfa+aox5hi 6	prkar1b	0.902367	2.87938e-124
mitfa+aox5hi 6	slc2a11b	1.1707	6.61362e-120
mitfa+aox5hi 6	gstp1	0.724387	4.67967e-119
mitfa+aox5hi 6	exoc3l1	1.3618	3.35204e-117
mitfa+aox5hi 6	tmsb4x	0.526172	7.76523e-113
mitfa+aox5hi 6	zgc:92161	1.26653	5.14667e-111
mitfa+aox5hi 6	nrgna	1.2249	1.7711e-109
mitfa+aox5hi 6	gstm.1	1.20012	4.29136e-96
mitfa+aox5hi 6	fam167b	0.947325	4.27289e-94
mitfa+aox5hi 6	bco1	0.979104	7.86113e-93
mitfa+aox5hi 6	clec3ba	1.24894	1.41401e-91
mitfa+aox5hi 6	cfl1	0.651925	5.15279e-88
mitfa+aox5hi 6	spock3	1.29749	7.79018e-82
mitfa+aox5hi 6	si:dkey-21a6.5	1.0709	1.09153e-81
mitfa+aox5hi 6	anxa1a	0.704729	2.20107e-81
mitfa+aox5hi 6	cygb1	1.14563	9.49285e-81
mitfa+aox5hi 6	gch2	0.591896	1.17388e-77
mitfa+aox5hi 6	si:zfos-1069f5.1	0.984605	9.28357e-75
mitfa+aox5hi 6	tmem243a	1.20691	7.50187e-74
mitfa+aox5hi 6	scarb1	0.982855	1.10798e-72
mitfa+aox5hi 6	krt18b	0.494533	1.32231e-68
mitfa+aox5hi 6	rbp5	1.15735	6.49816e-67
mitfa+aox5hi 6	mdh1aa	0.603418	2.24212e-65
mitfa+aox5hi 6	qsox1	0.908821	4.08377e-62
mitfa+aox5hi 6	cst3	0.896326	5.63418e-62
mitfa+aox5hi 6	si:dkey-251i10.2	0.77846	1.68234e-61
mitfa+aox5hi 6	cdaa	1.11952	1.68052e-60
mitfa+aox5hi 6	litaf	0.862866	2.68128e-58
mitfa+aox5hi 6	prdx5	0.515114	8.76818e-58
mitfa+aox5hi 6	opn5	1.08999	7.66076e-57
mitfa+aox5hi 6	phyhd1	1.11208	1.93266e-55
mitfa+aox5hi 6	si:zfos-943e10.1	1.11111	9.35445e-55
mitfa+aox5hi 6	slc2a15a	0.696258	2.00189e-50
mitfa+aox5hi 6	thy1	0.598413	2.44658e-50
mitfa+aox5hi 6	pts	1.15392	5.15001e-50
mitfa+aox5hi 6	chp2	1.15604	5.81248e-50
mitfa+aox5hi 6	bco2b	0.937899	8.42045e-50
mitfa+aox5hi 6	cox8b	1.05616	6.48524e-49
mitfa+aox5hi 6	COX3	0.289584	1.40546e-47
mitfa+aox5hi 6	pttg1ipb	0.90517	1.92073e-47
mitfa+aox5hi 6	pnp4a	0.911567	2.06241e-46
mitfa+aox5hi 6	rab34b	0.890615	5.57229e-46
mitfa+aox5hi 6	mc5ra	1.05231	7.3873e-46
mitfa+aox5hi 6	rasef	0.934048	2.06118e-45
mitfa+aox5hi 6	mt-co1	0.268247	2.69717e-43
mitfa+aox5hi 6	sprb	0.546856	1.60878e-41
mitfa+aox5hi 6	icn	0.309773	3.17576e-41
mitfa+aox5hi 6	fxyd1	1.12842	8.56335e-40
mitfa+aox5hi 6	si:dkey-200l5.4	0.790475	4.04886e-39
mitfa+aox5hi 6	actb2	0.314074	1.34e-38
mitfa+aox5hi 6	eif4ebp3	0.999017	3.36395e-36
mitfa+aox5hi 6	map1sa	1.11761	1.16991e-35
mitfa+aox5hi 6	gfpt2	0.883646	2.76535e-35
mitfa+aox5hi 6	zgc:113142	0.841857	4.11833e-33
mitfa+aox5hi 6	xdh	0.749195	7.28069e-31
mitfa+aox5hi 6	csrp2	0.779235	5.89402e-30
mitfa+aox5hi 6	pgr	0.516811	1.47991e-29
mitfa+aox5hi 6	gsna	0.674528	5.70006e-29
mitfa+aox5hi 6	pmp22b	0.779338	7.09836e-28
mitfa+aox5hi 6	dlc	0.476915	3.75634e-27
mitfa+aox5hi 6	fxyd6l	0.781057	4.0236e-27
mitfa+aox5hi 6	si:ch211-286o17.1	0.78177	7.26368e-26
mitfa+aox5hi 6	atic	1.01915	7.29239e-26
mitfa+aox5hi 6	kif5bb	0.941761	6.84699e-25
mitfa+aox5hi 6	ehd2b	0.769858	9.03194e-25
mitfa+aox5hi 6	reep1	0.456169	1.09525e-24
mitfa+aox5hi 6	pik3c3	0.975306	3.08447e-24
mitfa+aox5hi 6	cd63	0.569992	5.58655e-24
mitfa+aox5hi 6	reep5	0.679993	1.55276e-23
mitfa+aox5hi 6	oacyl	0.693402	1.64344e-23
mitfa+aox5hi 6	rtn1b	0.865509	2.03176e-23
mitfa+aox5hi 7	aldob	1.64072	0
mitfa+aox5hi 7	cyt1	2.90081	0
mitfa+aox5hi 7	krt91	1.82537	0
mitfa+aox5hi 7	dio3a	1.51922	7.83373e-300
mitfa+aox5hi 7	tmem130	1.1517	3.06948e-277
mitfa+aox5hi 7	mdh1aa	1.06752	4.53025e-248
mitfa+aox5hi 7	btc	0.471089	2.25787e-243
mitfa+aox5hi 7	paics	1.16622	1.91661e-241
mitfa+aox5hi 7	rhag	0.780297	9.6365e-234
mitfa+aox5hi 7	pnpla3	0.841083	9.45025e-206
mitfa+aox5hi 7	tmsb1	0.82039	7.80548e-189
mitfa+aox5hi 7	hsp70l	1.05747	2.1739e-174
mitfa+aox5hi 7	socs3a	0.809173	3.38081e-172
mitfa+aox5hi 7	fosb	1.04932	6.06394e-171
mitfa+aox5hi 7	aqp3a	0.757768	1.60813e-163
mitfa+aox5hi 7	pts	0.897356	2.9808e-158
mitfa+aox5hi 7	ncam1a	0.728635	5.75267e-157
mitfa+aox5hi 7	anxa1a	0.821387	1.29677e-154
mitfa+aox5hi 7	hsp70.2	0.996053	9.99493e-154
mitfa+aox5hi 7	cxcl14	0.619818	3.96284e-152
mitfa+aox5hi 7	tagln2	0.758957	2.54324e-149
mitfa+aox5hi 7	xbp1	0.73346	3.29434e-145
mitfa+aox5hi 7	TMEM19	0.721703	1.81487e-140
mitfa+aox5hi 7	slc2a11b	0.694333	2.47331e-139
mitfa+aox5hi 7	sprb	0.728374	9.0679e-138
mitfa+aox5hi 7	plxdc2	0.722328	1.36969e-137
mitfa+aox5hi 7	sdc4	0.908083	8.6413e-136
mitfa+aox5hi 7	zgc:153031	0.671962	1.20219e-131
mitfa+aox5hi 7	timp4.3	0.788069	2.45715e-130
mitfa+aox5hi 7	hsp70.3	0.894713	4.90196e-127
mitfa+aox5hi 7	s100a10b	0.713776	2.42608e-123
mitfa+aox5hi 7	si:dkey-51e6.1	0.728724	7.18591e-121
mitfa+aox5hi 7	CR383676.1	0.599894	1.2444e-114
mitfa+aox5hi 7	ca10a	0.350797	3.63632e-112
mitfa+aox5hi 7	junba	0.630919	1.10234e-111
mitfa+aox5hi 7	CR854839.1	0.751607	2.78873e-110
mitfa+aox5hi 7	rsrp1	0.617125	5.07385e-109
mitfa+aox5hi 7	lipeb	0.696042	9.32912e-109
mitfa+aox5hi 7	tdh	0.968567	5.68642e-108
mitfa+aox5hi 7	slc45a2	0.692006	1.17055e-107
mitfa+aox5hi 7	gstt1a	0.727618	4.93327e-106
mitfa+aox5hi 7	cd99	0.651855	1.47847e-105
mitfa+aox5hi 7	lrrc15	0.668372	6.63876e-104
mitfa+aox5hi 7	tmeff2b	0.622881	4.4153e-103
mitfa+aox5hi 7	prdx5	0.467233	5.98697e-102
mitfa+aox5hi 7	mcl1a	0.604121	9.04921e-102
mitfa+aox5hi 7	hsp70.1	0.895113	1.60586e-101
mitfa+aox5hi 7	igfbp1a	1.30705	1.2398e-99
mitfa+aox5hi 7	slc43a3b	0.716605	4.65983e-99
mitfa+aox5hi 7	usp2b	0.670512	2.06615e-98
mitfa+aox5hi 7	ar	0.626542	5.96443e-98
mitfa+aox5hi 7	tat	0.875361	7.23491e-98
mitfa+aox5hi 7	eef1a1l1	0.409015	2.49237e-97
mitfa+aox5hi 7	prnpb	0.65187	2.99891e-97
mitfa+aox5hi 7	fosl1a	0.711958	2.08924e-96
mitfa+aox5hi 7	higd1a	0.729168	2.60312e-96
mitfa+aox5hi 7	csrnp1b	0.719556	4.08286e-96
mitfa+aox5hi 7	adcy2b	0.275883	3.32369e-95
mitfa+aox5hi 7	btg2	0.48364	3.00448e-93
mitfa+aox5hi 7	pax7a	0.517956	5.78658e-93
mitfa+aox5hi 7	gch2	0.807622	6.78609e-92
mitfa+aox5hi 7	midn	0.743601	2.7342e-89
mitfa+aox5hi 7	hsp90aa1.2	0.79536	2.64847e-88
mitfa+aox5hi 7	ssuh2.1	0.555547	4.79786e-85
mitfa+aox5hi 7	rasef	0.463092	1.35439e-84
mitfa+aox5hi 7	dnajb1b	0.592456	3.23107e-84
mitfa+aox5hi 7	si:cabz01007802.1	0.588753	9.7734e-84
mitfa+aox5hi 7	si:ch211-132b12.7	0.504703	1.35356e-83
mitfa+aox5hi 7	klf15	0.72495	3.45764e-83
mitfa+aox5hi 7	bcl2b	0.477074	1.22671e-82
mitfa+aox5hi 7	si:dkey-251i10.2	0.674018	1.59934e-82
mitfa+aox5hi 7	pax7b	0.463519	1.48003e-81
mitfa+aox5hi 7	aldh9a1a.1	0.353847	2.16003e-81
mitfa+aox5hi 7	aclya	0.470314	8.1084e-80
mitfa+aox5hi 7	slc20a1b	0.796877	3.30962e-76
mitfa+aox5hi 7	pnrc2	0.491536	5.01539e-76
mitfa+aox5hi 7	cyb561a3b	0.455348	2.98298e-75
mitfa+aox5hi 7	FQ323156.1	0.476908	2.61318e-74
mitfa+aox5hi 7	ivns1abpa	0.535602	5.82941e-73
mitfa+aox5hi 7	zgc:153317	0.468267	1.97201e-72
mitfa+aox5hi 7	eif4ebp3l	0.636425	2.50255e-72
mitfa+aox5hi 7	krt18a.1	0.598007	1.91058e-71
mitfa+aox5hi 7	socs1a	0.573331	2.54927e-71
mitfa+aox5hi 7	oaz2a	0.41877	3.6513e-70
mitfa+aox5hi 7	tgfbr1a	0.39281	5.2446e-70
mitfa+aox5hi 7	eef1da	0.50123	7.2625e-70
mitfa+aox5hi 7	gal3st2	0.49074	1.14603e-68
mitfa+aox5hi 7	krt8	0.408353	2.14344e-68
mitfa+aox5hi 7	cdh18a	0.464414	1.29303e-67
mitfa+aox5hi 7	dap1b	0.418572	3.21778e-67
mitfa+aox5hi 7	vat1	0.421134	2.93277e-65
mitfa+aox5hi 7	creg1	0.345003	4.92843e-65
mitfa+aox5hi 7	apoeb	0.404979	9.17089e-64
mitfa+aox5hi 7	cmtm7	0.480206	2.56112e-59
mitfa+aox5hi 7	fxyd6l	0.396092	1.18272e-58
mitfa+aox5hi 7	adipor2	0.568833	1.38278e-57
mitfa+aox5hi 7	kcnk5b	0.511379	1.6295e-57
mitfa+aox5hi 7	ubb	0.389757	1.59279e-56
mitfa+aox5hi 7	mcl1b	0.381114	2.31744e-56
mitfa+aox5hi 7	ada	0.403519	2.92502e-56
mitfa+aox5hi 8	slc8a1a	1.21938	0
mitfa+aox5hi 8	ndufa4	0.437787	0
mitfa+aox5hi 8	zgc:153031	2.41297	0
mitfa+aox5hi 8	oacyl	2.02772	0
mitfa+aox5hi 8	ssuh2.1	0.858291	0
mitfa+aox5hi 8	sypa	0.56565	0
mitfa+aox5hi 8	si:ch211-214p13.9	1.12867	0
mitfa+aox5hi 8	oxr1b	0.847638	1.72931e-291
mitfa+aox5hi 8	adrb2a	0.929131	2.07765e-258
mitfa+aox5hi 8	chst6	0.581239	9.98483e-255
mitfa+aox5hi 8	igfbp1a	1.75815	2.77295e-247
mitfa+aox5hi 8	si:ch211-170d8.8	0.652193	2.92664e-233
mitfa+aox5hi 8	inka1a	0.912439	1.42829e-232
mitfa+aox5hi 8	morn2	1.35006	2.1769e-217
mitfa+aox5hi 8	cspg5b	0.283926	1.62596e-214
mitfa+aox5hi 8	gch1	1.3414	4.97363e-211
mitfa+aox5hi 8	si:dkeyp-66d1.7	0.932248	1.03938e-207
mitfa+aox5hi 8	emilin1a	0.52054	1.4128e-195
mitfa+aox5hi 8	pacsin1b	0.457987	1.62301e-194
mitfa+aox5hi 8	sgk3	1.08699	4.6341e-191
mitfa+aox5hi 8	atic	1.00557	1.90062e-190
mitfa+aox5hi 8	itga6b	0.732409	1.5197e-187
mitfa+aox5hi 8	rasd1	1.31365	6.63324e-183
mitfa+aox5hi 8	zgc:113337	1.18996	3.01118e-182
mitfa+aox5hi 8	si:dkey-251i10.2	1.4557	6.15998e-182
mitfa+aox5hi 8	eef2l2	0.68514	6.48585e-178
mitfa+aox5hi 8	enpp6	0.464679	5.0706e-177
mitfa+aox5hi 8	aox5	1.15623	1.27441e-174
mitfa+aox5hi 8	tmem235	0.750652	2.51088e-174
mitfa+aox5hi 8	kcnma1a	0.457105	7.12289e-174
mitfa+aox5hi 8	slc41a2a	0.652541	2.57729e-173
mitfa+aox5hi 8	agmo	0.770733	2.12301e-167
mitfa+aox5hi 8	apol1	0.970634	8.94893e-167
mitfa+aox5hi 8	CABZ01072077.1	0.574789	5.66719e-166
mitfa+aox5hi 8	zgc:92162	0.555079	6.60508e-161
mitfa+aox5hi 8	fkbp1b	0.643828	8.76596e-159
mitfa+aox5hi 8	si:dkey-30c15.17	0.254197	5.56877e-154
mitfa+aox5hi 8	plk3	0.950695	9.89758e-151
mitfa+aox5hi 8	gstp1	1.98434	8.54837e-150
mitfa+aox5hi 8	si:ch211-210c8.7	0.731406	1.04703e-149
mitfa+aox5hi 8	prss23	0.441566	1.08802e-148
mitfa+aox5hi 8	lgals2a	1.01559	4.09406e-147
mitfa+aox5hi 8	ptprz1b	0.531192	4.04235e-146
mitfa+aox5hi 8	gal3st2	0.727431	5.12241e-145
mitfa+aox5hi 8	sigmar1	0.950027	2.25414e-144
mitfa+aox5hi 8	nrp2b	0.741981	1.42707e-143
mitfa+aox5hi 8	plk2b	0.86512	1.94053e-143
mitfa+aox5hi 8	ctgfa	0.800117	3.44799e-143
mitfa+aox5hi 8	gphna	0.538579	2.45235e-142
mitfa+aox5hi 8	lipea	0.843168	3.51338e-141
mitfa+aox5hi 8	fzd1	0.479556	6.92041e-141
mitfa+aox5hi 8	krt91	1.73064	7.52843e-141
mitfa+aox5hi 8	si:ch73-119p20.1	0.349703	2.87943e-138
mitfa+aox5hi 8	palm1a	0.519971	3.8212e-138
mitfa+aox5hi 8	slc45a2	0.965005	5.40226e-137
mitfa+aox5hi 8	pon3.2	0.651205	2.46159e-136
mitfa+aox5hi 8	cyb561a3b	0.533291	4.20303e-135
mitfa+aox5hi 8	plin2	0.620202	4.7296e-135
mitfa+aox5hi 8	pabpc1b	0.874624	1.53161e-133
mitfa+aox5hi 8	mocos	0.746032	2.82626e-133
mitfa+aox5hi 8	dusp6	0.895538	2.91841e-133
mitfa+aox5hi 8	abhd15a	0.404723	1.78158e-130
mitfa+aox5hi 8	aqp3a	1.04813	2.50108e-130
mitfa+aox5hi 8	adam17a	0.755109	3.56877e-129
mitfa+aox5hi 8	tm7sf3	0.609811	6.56695e-129
mitfa+aox5hi 8	crabp2b	0.913623	2.10477e-127
mitfa+aox5hi 8	ndrg3a	0.426156	6.27528e-127
mitfa+aox5hi 8	bco1	0.949076	4.15391e-126
mitfa+aox5hi 8	add3b	0.590404	6.70549e-125
mitfa+aox5hi 8	zgc:153184	0.534707	4.18383e-124
mitfa+aox5hi 8	tgm1l1	0.620579	1.27989e-123
mitfa+aox5hi 8	ivns1abpa	0.896804	6.50626e-123
mitfa+aox5hi 8	tp53inp2	0.6835	3.49088e-122
mitfa+aox5hi 8	aldh1l1	0.504668	4.18912e-122
mitfa+aox5hi 8	slc2a15a	0.970627	1.09277e-120
mitfa+aox5hi 8	sgk2b	0.253598	1.15121e-120
mitfa+aox5hi 8	arg2	0.605734	2.83011e-120
mitfa+aox5hi 8	angptl4	0.967707	3.80251e-120
mitfa+aox5hi 8	emp2	0.52457	7.26503e-120
mitfa+aox5hi 8	ncaldb	0.321437	1.76828e-118
mitfa+aox5hi 8	si:ch211-165b10.3	0.426843	5.75675e-117
mitfa+aox5hi 8	uraha	0.897411	8.69898e-117
mitfa+aox5hi 8	foxd3	0.959548	2.46375e-116
mitfa+aox5hi 8	si:ch211-286o17.1	0.769237	5.77909e-116
mitfa+aox5hi 8	fnbp1l	0.584545	1.86543e-115
mitfa+aox5hi 8	pcdh10a	0.777385	1.09971e-114
mitfa+aox5hi 8	litaf	0.86602	4.91262e-114
mitfa+aox5hi 8	FP236542.1	0.628929	1.09515e-112
mitfa+aox5hi 8	cmtm7	0.777876	1.75002e-112
mitfa+aox5hi 8	magixa	0.375576	2.33497e-111
mitfa+aox5hi 8	atp1b3a	0.44304	2.88718e-111
mitfa+aox5hi 8	arhgef33	0.87844	3.25857e-111
mitfa+aox5hi 8	chp1	0.720324	7.57945e-111
mitfa+aox5hi 8	TMEM19	1.00187	1.95192e-110
mitfa+aox5hi 8	plin6	0.818129	3.97074e-110
mitfa+aox5hi 8	aclya	0.617687	5.97034e-109
mitfa+aox5hi 8	usp2b	0.759975	6.11084e-109
mitfa+aox5hi 8	rhoq	0.593407	6.85413e-109
mitfa+aox5hi 8	tmem130	0.780738	5.22163e-108
mitfa+aox5hi 8	lrch1	0.522865	1.69645e-107
mitfa+aox5hi 9	msx1b	1.25823	0
mitfa+aox5hi 9	dgat2	1.17526	0
mitfa+aox5hi 9	alpl	1.63945	0
mitfa+aox5hi 9	capgb	1.49131	0
mitfa+aox5hi 9	icn	1.27457	0
mitfa+aox5hi 9	LOC103909107	1.02639	0
mitfa+aox5hi 9	krt91	1.45784	0
mitfa+aox5hi 9	msx2b	1.44544	0
mitfa+aox5hi 9	vcam1b	1.17208	0
mitfa+aox5hi 9	cav1	1.48731	0
mitfa+aox5hi 9	zgc:92161	1.84872	0
mitfa+aox5hi 9	si:ch73-366l1.5	0.80461	0
mitfa+aox5hi 9	tagln2	1.30659	0
mitfa+aox5hi 9	scinla	1.51171	0
mitfa+aox5hi 9	hyal2a	0.855706	0
mitfa+aox5hi 9	igfbp2a	0.315306	1.65115e-303
mitfa+aox5hi 9	aldob	1.3325	4.74039e-294
mitfa+aox5hi 9	tmem130	1.35738	2.02036e-289
mitfa+aox5hi 9	lrrc75ba	0.480312	1.0002e-284
mitfa+aox5hi 9	siae	1.27024	6.17632e-284
mitfa+aox5hi 9	s100w	1.15339	1.90428e-278
mitfa+aox5hi 9	TMEM19	1.37363	3.85748e-256
mitfa+aox5hi 9	nfkbiaa	1.71083	2.0489e-255
mitfa+aox5hi 9	gata2a	0.715676	4.80158e-255
mitfa+aox5hi 9	cemip	0.628548	1.21202e-254
mitfa+aox5hi 9	itpk1a	1.07384	2.96075e-253
mitfa+aox5hi 9	ncam1a	0.95381	3.86017e-253
mitfa+aox5hi 9	CABZ01030033.1	1.04867	3.01301e-250
mitfa+aox5hi 9	sncga	0.83483	3.9537e-249
mitfa+aox5hi 9	anxa1a	1.13846	5.18559e-239
mitfa+aox5hi 9	krt18a.1	1.82932	2.55834e-230
mitfa+aox5hi 9	ak1	1.14791	1.67309e-222
mitfa+aox5hi 9	pleca	1.26244	3.43997e-222
mitfa+aox5hi 9	si:ch211-39i22.1	0.978097	1.63848e-218
mitfa+aox5hi 9	cd99	1.26891	2.05445e-215
mitfa+aox5hi 9	pax7a	0.915106	1.02021e-213
mitfa+aox5hi 9	krt8	0.877542	4.35004e-210
mitfa+aox5hi 9	cspg4	0.938059	4.79376e-205
mitfa+aox5hi 9	TCIM-1-of-many	1.97983	9.22263e-203
mitfa+aox5hi 9	pah	0.764585	1.83943e-201
mitfa+aox5hi 9	plxdc2	0.886076	7.49588e-193
mitfa+aox5hi 9	npr1b	0.531506	8.49937e-189
mitfa+aox5hi 9	adora2ab	0.491712	2.50729e-184
mitfa+aox5hi 9	lgals3b	0.984463	3.82754e-184
mitfa+aox5hi 9	lipf	0.934669	4.09236e-181
mitfa+aox5hi 9	atoh8	0.58101	3.1414e-180
mitfa+aox5hi 9	nfkbiab	1.32729	1.83617e-172
mitfa+aox5hi 9	cobll1a	0.294976	1.16397e-171
mitfa+aox5hi 9	ucp2	1.51288	2.2444e-166
mitfa+aox5hi 9	fosb	1.23527	3.32199e-166
mitfa+aox5hi 9	s100a10b	0.958999	4.47301e-158
mitfa+aox5hi 9	cxcl18b	2.03399	4.82396e-158
mitfa+aox5hi 9	gstp1	1.8681	1.22008e-157
mitfa+aox5hi 9	zgc:162730	1.34078	4.7502e-156
mitfa+aox5hi 9	si:cabz01007802.1	0.847675	5.16497e-156
mitfa+aox5hi 9	si:dkey-251i10.2	1.2405	5.24754e-154
mitfa+aox5hi 9	aqp3a	0.786903	1.3018e-152
mitfa+aox5hi 9	marcksl1b	1.0945	6.39648e-152
mitfa+aox5hi 9	ca10a	0.357166	9.45286e-147
mitfa+aox5hi 9	pnpla3	0.653415	2.83441e-143
mitfa+aox5hi 9	cavin1b	0.821154	6.06025e-143
mitfa+aox5hi 9	bcl2b	0.670341	1.09817e-142
mitfa+aox5hi 9	cx35.4	0.352334	8.98249e-142
mitfa+aox5hi 9	BX664618.1	0.327488	1.15143e-141
mitfa+aox5hi 9	prnprs3	0.75569	1.45612e-141
mitfa+aox5hi 9	krt18b	0.742693	1.92727e-141
mitfa+aox5hi 9	glulb	0.929213	2.42973e-141
mitfa+aox5hi 9	thrab	0.948627	4.32791e-140
mitfa+aox5hi 9	mdh1aa	0.800488	1.09872e-137
mitfa+aox5hi 9	jun	0.997411	1.8193e-134
mitfa+aox5hi 9	akr1b1	1.0349	4.34841e-134
mitfa+aox5hi 9	gsto2	0.684646	7.7688e-134
mitfa+aox5hi 9	slc2a11b	0.798686	3.58075e-133
mitfa+aox5hi 9	socs3a	0.932171	3.20682e-131
mitfa+aox5hi 9	CR339041.1	0.70522	1.03985e-130
mitfa+aox5hi 9	scarb1	0.688048	1.68005e-127
mitfa+aox5hi 9	prodha	0.612476	2.42045e-127
mitfa+aox5hi 9	arl5c	0.844285	2.59211e-123
mitfa+aox5hi 9	si:ch211-191c10.1	0.464996	3.04692e-123
mitfa+aox5hi 9	cd9a	0.448747	4.0803e-121
mitfa+aox5hi 9	irak3	0.51919	2.17257e-120
mitfa+aox5hi 9	npy2rl	0.328346	2.87732e-117
mitfa+aox5hi 9	prnpb	0.801219	1.09365e-113
mitfa+aox5hi 9	XLOC-003678	0.520726	5.27261e-111
mitfa+aox5hi 9	myl9b	0.566994	1.4643e-110
mitfa+aox5hi 9	pts	0.734096	6.2702e-110
mitfa+aox5hi 9	zgc:153317	0.786895	3.14334e-109
mitfa+aox5hi 9	ier2b	0.954979	1.21177e-108
mitfa+aox5hi 9	cpn1	0.42157	1.29419e-108
mitfa+aox5hi 9	xbp1	0.6835	2.34662e-105
mitfa+aox5hi 9	tspan10	0.652168	7.1491e-105
mitfa+aox5hi 9	id3	0.56957	1.1145e-104
mitfa+aox5hi 9	ccl25b	0.422091	3.1294e-104
mitfa+aox5hi 9	tefa	0.698152	4.45814e-104
mitfa+aox5hi 9	acsl1a	0.652299	1.01878e-103
mitfa+aox5hi 9	gadd45ba	0.853936	6.02619e-103
mitfa+aox5hi 9	atf3	1.3832	6.1414e-103
mitfa+aox5hi 9	jdp2b	1.19047	8.9548e-103
mitfa+aox5hi 9	sqstm1	1.06042	1.85293e-102
mitfa+aox5hi 9	CR848833.1	0.528326	1.83144e-101
mitfa+aox5hi 10	avpr2ab	1.47328	0
mitfa+aox5hi 10	gipr	0.613406	3.98865e-250
mitfa+aox5hi 10	pltp	1.15078	1.22068e-239
mitfa+aox5hi 10	msx2b	1.37715	3.47826e-201
mitfa+aox5hi 10	CR847953.1	1.1297	1.78494e-181
mitfa+aox5hi 10	mlip	1.09532	2.99714e-150
mitfa+aox5hi 10	mxra8b	0.481124	1.07766e-109
mitfa+aox5hi 10	si:ch1073-184j22.1	0.821385	2.74578e-107
mitfa+aox5hi 10	acvrl1	0.673869	1.43553e-103
mitfa+aox5hi 10	hyal2b	0.723412	1.53819e-101
mitfa+aox5hi 10	alpl	1.10938	5.89814e-94
mitfa+aox5hi 10	cxcl14	1.36952	5.30312e-93
mitfa+aox5hi 10	si:ch211-251b21.1	1.50068	1.02247e-90
mitfa+aox5hi 10	capgb	1.02081	5.31421e-86
mitfa+aox5hi 10	robo2	1.05184	1.09243e-84
mitfa+aox5hi 10	aqp3a	1.36644	2.78702e-76
mitfa+aox5hi 10	LOC101882365	0.947218	1.01151e-74
mitfa+aox5hi 10	hsd11b1la	1.35384	4.68061e-65
mitfa+aox5hi 10	lipeb	1.31463	5.93523e-57
mitfa+aox5hi 10	mdh1aa	1.20898	1.62553e-56
mitfa+aox5hi 10	id3	1.16595	3.33096e-56
mitfa+aox5hi 10	bco2b	1.52756	9.51297e-54
mitfa+aox5hi 10	icn	1.10322	1.023e-53
mitfa+aox5hi 10	mab21l1	0.45321	1.64003e-52
mitfa+aox5hi 10	prnpb	1.18508	5.32523e-52
mitfa+aox5hi 10	fgfr2	0.457013	7.72984e-49
mitfa+aox5hi 10	si:ch211-39i22.1	0.826268	2.1423e-48
mitfa+aox5hi 10	gpd1b	0.675446	3.66982e-48
mitfa+aox5hi 10	cd99	1.01879	1.11836e-46
mitfa+aox5hi 10	tat	1.20493	2.4884e-46
mitfa+aox5hi 10	prdx5	0.885633	2.7247e-46
mitfa+aox5hi 10	rgs2	0.515387	8.14944e-46
mitfa+aox5hi 10	s100a10b	1.13612	1.5368e-45
mitfa+aox5hi 10	TMEM19	1.36578	8.26625e-45
mitfa+aox5hi 10	CABZ01030033.1	1.54305	2.35406e-44
mitfa+aox5hi 10	id2a	1.15549	4.44055e-43
mitfa+aox5hi 10	BX664618.1	0.335742	1.92252e-41
mitfa+aox5hi 10	thy1	1.04333	2.88962e-41
mitfa+aox5hi 10	si:ch211-246i5.5	0.490563	1.32308e-40
mitfa+aox5hi 10	XLOC-035147	0.386153	4.46436e-40
mitfa+aox5hi 10	hs3st3b1a	0.398915	8.90428e-40
mitfa+aox5hi 10	tmem130	0.946473	6.52562e-39
mitfa+aox5hi 10	scarb1	0.870646	1.99174e-38
mitfa+aox5hi 10	anxa1a	0.94551	7.28403e-38
mitfa+aox5hi 10	aldob	1.0112	7.49825e-38
mitfa+aox5hi 10	tmsb1	1.07865	1.0277e-37
mitfa+aox5hi 10	si:ch211-196g2.4	0.401085	1.04521e-36
mitfa+aox5hi 10	pld1a	0.823406	2.24261e-36
mitfa+aox5hi 10	paics	0.964452	1.6224e-35
mitfa+aox5hi 10	tspan12	0.589892	1.7823e-35
mitfa+aox5hi 10	ube2ql1	0.849928	7.7965e-34
mitfa+aox5hi 10	cavin1b	0.752378	3.90828e-33
mitfa+aox5hi 10	pax7a	0.916634	1.08614e-32
mitfa+aox5hi 10	cspg4	0.929684	4.01593e-32
mitfa+aox5hi 10	gldc	0.797521	4.57945e-32
mitfa+aox5hi 10	rgs3a	0.968029	8.36952e-32
mitfa+aox5hi 10	id1	0.815785	2.61581e-31
mitfa+aox5hi 10	XLOC-019062	0.871597	7.43262e-31
mitfa+aox5hi 10	irs2b	0.798185	1.25523e-30
mitfa+aox5hi 10	pfkfb3	0.735754	1.74562e-30
mitfa+aox5hi 10	si:dkey-10o6.2	0.499027	3.07825e-30
mitfa+aox5hi 10	ppp1r1c	0.331209	1.34709e-29
mitfa+aox5hi 10	zgc:153317	0.960279	1.95191e-29
mitfa+aox5hi 10	ak1	0.8208	1.13617e-28
mitfa+aox5hi 10	NAV1-1-of-many	0.852709	2.19101e-28
mitfa+aox5hi 10	lrrc15	0.827647	5.88734e-28
mitfa+aox5hi 10	aclya	0.775642	7.6291e-28
mitfa+aox5hi 10	C12orf75	0.780229	9.41429e-28
mitfa+aox5hi 10	rsrp1	0.820317	2.67965e-27
mitfa+aox5hi 10	CR383676.1	0.738742	3.1016e-27
mitfa+aox5hi 10	plpp2b	0.493934	3.27467e-27
mitfa+aox5hi 10	gnai1	0.697694	9.1251e-27
mitfa+aox5hi 10	tagln2	0.865779	1.0302e-26
mitfa+aox5hi 10	prnprs3	0.771699	1.44889e-26
mitfa+aox5hi 10	phlda2	0.518904	3.27415e-26
mitfa+aox5hi 10	si:dkey-222b8.1	0.711927	5.51984e-26
mitfa+aox5hi 10	pleca	0.9425	1.45669e-25
mitfa+aox5hi 10	gpm6bb	0.825032	1.39592e-24
mitfa+aox5hi 10	adipor2	0.832666	1.65704e-24
mitfa+aox5hi 10	zgc:153031	0.767075	1.67132e-24
mitfa+aox5hi 10	vps9d1	0.926291	2.91539e-24
mitfa+aox5hi 10	il15	0.396904	3.6148e-24
mitfa+aox5hi 10	ank3b	0.77953	4.36481e-24
mitfa+aox5hi 10	plecb	0.892421	9.5827e-24
mitfa+aox5hi 10	ano10b	0.65458	3.54575e-23
mitfa+aox5hi 10	hsp70l	1.13075	9.93058e-23
mitfa+aox5hi 10	s100w	0.809559	5.87116e-22
mitfa+aox5hi 10	atoh8	0.515126	6.09489e-22
mitfa+aox5hi 10	fscn1a	0.691518	7.03227e-22
mitfa+aox5hi 10	slc2a11b	0.544181	1.12437e-21
mitfa+aox5hi 10	bhmt	0.395359	1.23112e-21
mitfa+aox5hi 10	sdc4	0.674556	1.74685e-21
mitfa+aox5hi 10	mlpha	0.647701	1.91823e-21
mitfa+aox5hi 10	npdc1a	0.861622	3.4235e-21
mitfa+aox5hi 10	cax1	0.557562	3.49406e-21
mitfa+aox5hi 10	krt91	0.498591	3.74327e-21
mitfa+aox5hi 10	slc2a15a	0.640626	3.76246e-21
mitfa+aox5hi 10	oaz2a	0.671272	1.04619e-20
mitfa+aox5hi 10	FQ323156.1	0.769214	1.12457e-20
mitfa+aox5hi 10	thrab	0.820525	1.31751e-20
mitfa+aox5hi 11	mri1	0.946737	0
mitfa+aox5hi 11	TCIM-1-of-many	1.61804	0
mitfa+aox5hi 11	ucp2	1.47483	0
mitfa+aox5hi 11	FP236542.1	0.704534	0
mitfa+aox5hi 11	scarb1	1.0877	0
mitfa+aox5hi 11	slc22a7a	0.991662	0
mitfa+aox5hi 11	rasd1	1.29373	0
mitfa+aox5hi 11	gch2	1.50742	0
mitfa+aox5hi 11	tmem235	0.987148	0
mitfa+aox5hi 11	slc2a15a	1.03844	0
mitfa+aox5hi 11	bscl2l	0.870198	0
mitfa+aox5hi 11	cplx2	0.442439	0
mitfa+aox5hi 11	atp1a3b	0.69114	0
mitfa+aox5hi 11	tmem145	0.596408	0
mitfa+aox5hi 11	plin6	1.06661	0
mitfa+aox5hi 11	sh3bp5b	0.703739	0
mitfa+aox5hi 11	morn2	0.995224	0
mitfa+aox5hi 11	si:dkey-190l8.2	0.351895	0
mitfa+aox5hi 11	xdh	0.998366	0
mitfa+aox5hi 11	vps9d1	0.745153	0
mitfa+aox5hi 11	siae	1.72774	0
mitfa+aox5hi 11	pgr	0.538442	0
mitfa+aox5hi 11	mc5ra	0.827072	0
mitfa+aox5hi 11	ube2ql1	0.973754	0
mitfa+aox5hi 11	XLOC-015286	0.312403	0
mitfa+aox5hi 11	mkxb	0.887519	0
mitfa+aox5hi 11	greb1l	0.517174	0
mitfa+aox5hi 11	rab6bb	0.973553	0
mitfa+aox5hi 11	col15a1b	0.913114	0
mitfa+aox5hi 11	cdh18a	0.738711	0
mitfa+aox5hi 11	ralyl	0.414101	0
mitfa+aox5hi 11	dub	0.71923	0
mitfa+aox5hi 11	aox6	1.12565	0
mitfa+aox5hi 11	CABZ01030033.1	0.916876	0
mitfa+aox5hi 11	si:dkey-126g1.9	0.87727	0
mitfa+aox5hi 11	igfbp6b	0.771582	0
mitfa+aox5hi 11	cdaa	0.959383	0
mitfa+aox5hi 11	zgc:110339	1.62698	0
mitfa+aox5hi 11	mfge8b	0.775473	0
mitfa+aox5hi 11	cygb1	1.35602	0
mitfa+aox5hi 11	cnn1b	1.03292	0
mitfa+aox5hi 11	zgc:92161	1.00761	0
mitfa+aox5hi 11	CR854839.1	0.961272	0
mitfa+aox5hi 11	mkln1	0.597974	0
mitfa+aox5hi 11	slc2a11b	0.937588	0
mitfa+aox5hi 11	nos1	0.430792	0
mitfa+aox5hi 11	nsmfb	0.470833	0
mitfa+aox5hi 11	gldc	0.913476	0
mitfa+aox5hi 11	spra	1.46764	0
mitfa+aox5hi 11	exosc2	0.91497	0
mitfa+aox5hi 11	asic4b	0.935092	0
mitfa+aox5hi 11	pnp5a	1.11507	0
mitfa+aox5hi 11	il16	0.630286	0
mitfa+aox5hi 11	si:dkey-85k7.7	0.57412	0
mitfa+aox5hi 11	vgf	1.2885	0
mitfa+aox5hi 11	hsd11b2	2.48666	0
mitfa+aox5hi 11	bco1	1.45256	0
mitfa+aox5hi 11	sprb	1.31115	0
mitfa+aox5hi 11	cbsb	1.08029	0
mitfa+aox5hi 11	LOC103910009	0.783766	0
mitfa+aox5hi 11	si:dkey-261h17.1	0.815538	2.23972e-303
mitfa+aox5hi 11	cyp2n13	0.599571	3.90666e-300
mitfa+aox5hi 11	fgfrl1a	0.480992	9.74086e-296
mitfa+aox5hi 11	sparc	0.63669	1.62988e-293
mitfa+aox5hi 11	itgb1a	0.668083	2.9859e-293
mitfa+aox5hi 11	rnd3a	0.767663	1.54641e-292
mitfa+aox5hi 11	tmem243a	0.750803	1.94852e-292
mitfa+aox5hi 11	atp6v0a1a	0.547557	5.1696e-292
mitfa+aox5hi 11	cdo1	0.827181	8.5935e-291
mitfa+aox5hi 11	irs2b	0.745584	2.3422e-289
mitfa+aox5hi 11	syt11b	0.361432	8.96012e-289
mitfa+aox5hi 11	inka1b	0.779198	9.87182e-287
mitfa+aox5hi 11	pax7b	1.01866	2.89198e-286
mitfa+aox5hi 11	ace	0.334555	9.26898e-286
mitfa+aox5hi 11	stt3b	0.662691	2.40165e-285
mitfa+aox5hi 11	tmem130	0.76324	3.89764e-284
mitfa+aox5hi 11	sox3	0.412712	9.66448e-282
mitfa+aox5hi 11	eppk1	0.473205	5.84927e-277
mitfa+aox5hi 11	st3gal3a	0.451262	1.22422e-273
mitfa+aox5hi 11	si:dkey-91i10.3	0.356084	1.68611e-273
mitfa+aox5hi 11	rgmb	0.751181	2.80973e-273
mitfa+aox5hi 11	si:ch211-194k22.8	0.758712	6.10682e-273
mitfa+aox5hi 11	cx39.4	0.668961	7.22993e-271
mitfa+aox5hi 11	cacna1c	0.337379	2.60559e-270
mitfa+aox5hi 11	rorab	0.521726	1.25033e-267
mitfa+aox5hi 11	lipf	0.731538	2.44876e-266
mitfa+aox5hi 11	stat5a	0.670771	3.92471e-266
mitfa+aox5hi 11	CABZ01021592.1	0.883147	8.55121e-263
mitfa+aox5hi 11	ank3b	0.805969	1.68527e-262
mitfa+aox5hi 11	hprt1l	0.28078	4.64041e-262
mitfa+aox5hi 11	atl3	0.717745	8.34939e-262
mitfa+aox5hi 11	si:ch211-195b13.1	0.880653	1.91696e-261
mitfa+aox5hi 11	mocos	0.612164	3.54538e-260
mitfa+aox5hi 11	XLOC-026010	0.746379	9.31377e-258
mitfa+aox5hi 11	litaf	0.795066	6.42515e-256
mitfa+aox5hi 11	pik3c3	0.604815	1.80014e-255
mitfa+aox5hi 11	spns3	0.598519	2.05944e-255
mitfa+aox5hi 11	npr1b	0.34748	2.82972e-255
mitfa+aox5hi 11	gse1	0.604992	8.22897e-254
mitfa+aox5hi 11	sgk3	0.534747	1.63476e-253
mitfa+aox5hi 12	mdh1aa	0.939886	0
mitfa+aox5hi 12	ccl25b	2.41501	0
mitfa+aox5hi 12	pts	1.34215	0
mitfa+aox5hi 12	gch2	1.48703	0
mitfa+aox5hi 12	aldob	1.83083	0
mitfa+aox5hi 12	xdh	0.926538	0
mitfa+aox5hi 12	siae	1.52063	0
mitfa+aox5hi 12	fosb	1.60814	0
mitfa+aox5hi 12	cyt1	1.32146	0
mitfa+aox5hi 12	krt91	1.51891	0
mitfa+aox5hi 12	col15a1b	1.09495	0
mitfa+aox5hi 12	cdh18a	0.706096	0
mitfa+aox5hi 12	paics	1.22315	0
mitfa+aox5hi 12	slc30a2	0.380775	0
mitfa+aox5hi 12	runx2b	0.532008	0
mitfa+aox5hi 12	aox6	0.883149	0
mitfa+aox5hi 12	cox8b	1.62452	0
mitfa+aox5hi 12	LOC110437755	1.96532	0
mitfa+aox5hi 12	tesmin	0.384863	0
mitfa+aox5hi 12	zgc:110339	2.11332	0
mitfa+aox5hi 12	mfge8b	0.910462	0
mitfa+aox5hi 12	si:ch73-366l1.5	0.602903	0
mitfa+aox5hi 12	pnpla3	0.72703	0
mitfa+aox5hi 12	akr1b1	1.38148	0
mitfa+aox5hi 12	hsd20b2	0.448802	0
mitfa+aox5hi 12	vgf	0.888843	0
mitfa+aox5hi 12	hsd11b2	0.858658	0
mitfa+aox5hi 12	smyd1b	0.516846	0
mitfa+aox5hi 12	sprb	1.21962	0
mitfa+aox5hi 12	gstt1a	0.956594	0
mitfa+aox5hi 12	cdo1	0.878743	0
mitfa+aox5hi 12	tmem130	0.844604	4.3033e-300
mitfa+aox5hi 12	vcam1b	0.736299	2.38119e-296
mitfa+aox5hi 12	TCIM-1-of-many	1.19802	9.5779e-290
mitfa+aox5hi 12	ucp2	1.37324	4.09255e-277
mitfa+aox5hi 12	rprma	0.428571	8.51953e-273
mitfa+aox5hi 12	pfkfb4b	0.83768	6.8672e-268
mitfa+aox5hi 12	gldc	0.638282	3.51313e-263
mitfa+aox5hi 12	nos1	0.43983	2.99846e-254
mitfa+aox5hi 12	msx1b	0.428443	9.5908e-252
mitfa+aox5hi 12	si:dkey-51e6.1	0.758108	2.10682e-250
mitfa+aox5hi 12	gyg1b	0.601082	2.57641e-250
mitfa+aox5hi 12	midn	1.16869	2.44187e-247
mitfa+aox5hi 12	bcl2b	0.5628	1.79328e-243
mitfa+aox5hi 12	jdp2b	1.05651	7.90433e-240
mitfa+aox5hi 12	pgr	0.366514	9.25424e-240
mitfa+aox5hi 12	lrrc75ba	0.324497	9.73796e-239
mitfa+aox5hi 12	pax7a	0.638308	3.1923e-237
mitfa+aox5hi 12	dio3a	0.957762	3.5463e-236
mitfa+aox5hi 12	eef1a1l1	0.560623	2.95995e-229
mitfa+aox5hi 12	nfkbiaa	1.0296	9.15101e-229
mitfa+aox5hi 12	slc43a3b	0.638522	2.03827e-228
mitfa+aox5hi 12	tmeff2b	0.68134	1.5023e-223
mitfa+aox5hi 12	ncam1a	0.586018	1.71781e-223
mitfa+aox5hi 12	adcy2b	0.336055	1.59518e-222
mitfa+aox5hi 12	fosab	0.655248	6.39889e-217
mitfa+aox5hi 12	slc2a11b	0.755408	2.3018e-216
mitfa+aox5hi 12	ldlrap1a	0.462842	1.55352e-213
mitfa+aox5hi 12	socs3a	0.668255	4.13681e-212
mitfa+aox5hi 12	tmem163a	0.640114	5.47171e-207
mitfa+aox5hi 12	grm6b	0.368042	1.18464e-203
mitfa+aox5hi 12	ube2ql1	0.467575	1.54594e-201
mitfa+aox5hi 12	mocs1	0.562325	2.10261e-201
mitfa+aox5hi 12	plxdc2	0.578777	6.55687e-198
mitfa+aox5hi 12	atp1a3b	0.41898	3.23239e-197
mitfa+aox5hi 12	ndst3	0.269293	4.83607e-192
mitfa+aox5hi 12	XLOC-044191	0.902379	1.29656e-188
mitfa+aox5hi 12	stk35	0.497977	5.37996e-188
mitfa+aox5hi 12	greb1l	0.504681	8.25381e-187
mitfa+aox5hi 12	zgc:92161	0.835567	4.29876e-186
mitfa+aox5hi 12	abi3bpb	0.31584	2.0886e-185
mitfa+aox5hi 12	scarb1	0.531353	9.35288e-182
mitfa+aox5hi 12	XLOC-026010	0.652056	7.18206e-181
mitfa+aox5hi 12	tmsb1	0.555126	1.64789e-174
mitfa+aox5hi 12	mocos	0.474606	3.76709e-170
mitfa+aox5hi 12	pcdh1a	0.25417	1.42411e-166
mitfa+aox5hi 12	msra	0.325107	2.29932e-166
mitfa+aox5hi 12	hsp70.3	0.704707	3.61468e-159
mitfa+aox5hi 12	tcea3	0.428425	7.47758e-159
mitfa+aox5hi 12	si:cabz01007802.1	0.557594	6.3135e-157
mitfa+aox5hi 12	LOC103910009	0.537247	2.66095e-155
mitfa+aox5hi 12	eef1b2	0.545443	8.57123e-155
mitfa+aox5hi 12	dub	0.404648	7.65669e-153
mitfa+aox5hi 12	XLOC-016546	0.433127	1.27232e-152
mitfa+aox5hi 12	spra	0.340709	5.17655e-151
mitfa+aox5hi 12	ascc1	0.405287	4.32527e-148
mitfa+aox5hi 12	tgfbr1a	0.465791	2.27778e-146
mitfa+aox5hi 12	TMEM19	0.389554	3.77635e-146
mitfa+aox5hi 12	cbsb	0.353508	6.47964e-146
mitfa+aox5hi 12	alpl	0.427286	4.49698e-144
mitfa+aox5hi 12	irs2b	0.499667	1.82694e-143
mitfa+aox5hi 12	tat	0.553073	3.024e-143
mitfa+aox5hi 12	zgc:165555.3	0.355057	3.05678e-143
mitfa+aox5hi 12	hsp70l	0.779667	7.67235e-141
mitfa+aox5hi 12	sdc4	0.701176	1.23306e-140
mitfa+aox5hi 12	slc22a7a	0.329041	2.57132e-140
mitfa+aox5hi 12	CR848833.1	0.393208	6.45211e-140
mitfa+aox5hi 12	eif4ebp3l	0.550852	1.07537e-138
mitfa+aox5hi 12	adgrv1	0.299988	6.37607e-138
mitfa+aox5hi 12	nsfa	0.404006	9.37391e-138
mitfa+aox5hi 13	LOC110439372	2.77189	0
mitfa+aox5hi 13	zgc:158463	3.00573	0
mitfa+aox5hi 13	NC-002333.17	1.93239	0
mitfa+aox5hi 13	NC-002333.4	2.30114	0
mitfa+aox5hi 13	mt-co1	1.48739	0
mitfa+aox5hi 13	mt-co2	1.5229	0
mitfa+aox5hi 13	COX3	1.56461	0
mitfa+aox5hi 13	mt-cyb	1.46712	0
mitfa+aox5hi 13	CABZ01045617.1	3.0484	0
mitfa+aox5hi 13	CABZ01072614.1	3.00859	0
mitfa+aox5hi 13	CT583728.24	1.91585	2.04894e-218
mitfa+aox5hi 13	XLOC-043834	2.37586	6.59824e-201
mitfa+aox5hi 13	ND4	1.38809	2.6785e-167
mitfa+aox5hi 13	ATP6	1.30284	2.98448e-165
mitfa+aox5hi 13	CT027638.1	1.76905	4.86742e-121
mitfa+aox5hi 13	mt-nd1	1.35168	4.69249e-110
mitfa+aox5hi 13	CR383676.1	1.03367	3.65905e-103
mitfa+aox5hi 13	ND3	1.33501	1.02013e-81
mitfa+aox5hi 13	ahnak	0.664552	8.05196e-71
mitfa+aox5hi 13	ND2	1.22029	2.82236e-63
mitfa+aox5hi 13	mt-nd5	1.20058	2.32859e-48
mitfa+aox5hi 13	arhgef33	0.962323	1.9083e-36
mitfa+aox5hi 13	pax7b	0.847011	1.26403e-31
mitfa+aox5hi 13	trpm1b	1.42745	5.73157e-24
mitfa+aox5hi 13	myo5aa	0.897005	1.28208e-21
mitfa+aox5hi 13	slc20a1b	0.301356	1.18562e-15
mitfa+aox5hi 13	usp10	0.282007	5.652e-15
mitfa+aox5hi 13	zc3h11a	0.278352	2.11507e-13
mitfa+aox5hi 13	rsf1b.1	0.286514	6.99237e-12
mitfa+aox5hi 13	lpp	0.254145	8.29143e-12
mitfa+aox5hi 13	dedd1	0.345509	8.94861e-12
mitfa+aox5hi 13	cpeb4b	0.350756	1.49134e-11
mitfa+aox5hi 13	sf3b1	0.285438	2.84022e-11
mitfa+aox5hi 13	ankrd11	0.347396	3.48124e-11
mitfa+aox5hi 13	tnfaip3	0.287809	3.90608e-11
mitfa+aox5hi 13	svild	0.251606	4.47006e-11
mitfa+aox5hi 13	pax3a	0.250494	1.04712e-10
mitfa+aox5hi 13	wu:fb16f03	0.323773	1.13233e-10
mitfa+aox5hi 13	CSDC2-1-of-many	0.318655	1.14272e-10
mitfa+aox5hi 13	qkia	0.335801	1.48976e-10
mitfa+aox5hi 13	nop2	0.308383	1.73344e-10
mitfa+aox5hi 13	ddx18	0.255264	1.89498e-10
mitfa+aox5hi 13	eva1ba	0.26614	2.25186e-10
mitfa+aox5hi 13	cep350	0.419827	7.6554e-10
mitfa+aox5hi 13	CR848833.1	0.94871	1.04905e-09
mitfa+aox5hi 13	mir21-1	0.315439	1.75919e-09
mitfa+aox5hi 13	gpx3	0.253255	2.35073e-09
mitfa+aox5hi 13	arid4a	0.271491	3.3745e-09
mitfa+aox5hi 13	socs1a	0.269526	1.28014e-08
mitfa+aox5hi 13	abl1	0.250781	1.42207e-08
mitfa+aox5hi 13	c2cd2	0.268936	1.69962e-08
mitfa+aox5hi 13	ablim3	0.302437	4.35491e-08
mitfa+aox5hi 13	rras2	0.323866	4.58204e-08
mitfa+aox5hi 13	elmsan1b	0.317378	6.23502e-08
mitfa+aox5hi 13	pprc1	0.251216	8.53082e-08
mitfa+aox5hi 13	XLOC-019062	0.35037	8.65444e-08
mitfa+aox5hi 13	LOC103910438	0.282197	1.02792e-07
mitfa+aox5hi 13	def8	0.258002	1.08602e-07
mitfa+aox5hi 13	hectd1	0.313434	1.92505e-07
mitfa+aox5hi 13	ddx24	0.287794	3.18802e-07
mitfa+aox5hi 13	ugcg	0.308026	3.26344e-07
mitfa+aox5hi 13	sox5	0.342491	3.37778e-07
mitfa+aox5hi 13	plxdc2	0.393819	3.46944e-07
mitfa+aox5hi 13	suco	0.318287	3.6636e-07
mitfa+aox5hi 13	bcl11ab	0.262162	3.87542e-07
mitfa+aox5hi 13	chn2	0.319321	3.94452e-07
mitfa+aox5hi 13	chd3	0.33651	9.14914e-07
mitfa+aox5hi 13	tnrc18	0.284094	9.89239e-07
mitfa+aox5hi 13	lats2	0.273405	1.12121e-06
mitfa+aox5hi 13	LOC101884617	0.753296	1.29619e-06
mitfa+aox5hi 13	ankib1a	0.274127	2.56702e-06
mitfa+aox5hi 13	apc	0.337669	2.56756e-06
mitfa+aox5hi 13	pax7a	1.04445	3.08347e-06
mitfa+aox5hi 13	sash1a	0.30187	3.55999e-06
mitfa+aox5hi 13	bmpr2a	0.25285	4.32299e-06
mitfa+aox5hi 13	si:ch211-196l7.4	0.316215	4.84208e-06
mitfa+aox5hi 13	arhgef1b	0.287364	5.48567e-06
mitfa+aox5hi 13	dctn1a	0.263185	5.50291e-06
mitfa+aox5hi 13	ogdha	0.362497	6.37582e-06
mitfa+aox5hi 13	chd2	0.313121	6.95235e-06
mitfa+aox5hi 13	gnas	0.384141	7.90148e-06
mitfa+aox5hi 13	rgl2	0.321092	8.64708e-06
mitfa+aox5hi 13	srpk1a	0.285234	9.07385e-06
mitfa+aox5hi 13	si:ch211-281l24.3	0.413735	1.22635e-05
mitfa+aox5hi 13	atp11a	0.328536	1.57502e-05
mitfa+aox5hi 13	rerea	0.268948	1.6427e-05
mitfa+aox5hi 13	si:zfos-2326c3.2	0.257229	1.80364e-05
mitfa+aox5hi 13	prkcz	0.26463	1.83368e-05
mitfa+aox5hi 13	rab11fip1b	0.978766	2.59153e-05
mitfa+aox5hi 13	wwc1	0.652118	2.89788e-05
mitfa+aox5hi 13	klf15	0.389651	3.81887e-05
mitfa+aox5hi 13	si:dkey-91i10.2	0.265163	5.06862e-05
mitfa+aox5hi 13	rb1cc1	0.322272	5.63224e-05
mitfa+aox5hi 13	sfpq	0.322086	5.86641e-05
mitfa+aox5hi 13	smarca2	0.290093	6.52887e-05
mitfa+aox5hi 13	cyth1a	0.305716	6.94737e-05
mitfa+aox5hi 13	esf1	0.253643	7.38637e-05
mitfa+aox5hi 13	dlc1	0.366978	7.5887e-05
[truncated: 1,362 more rows]

## Sheet: Sample Statistics
SUPPLEMENTAL FILE 1: Table of Sample Statistics
Sample	Day	Strain	CellsPassingQC
WTDay0	0	WT	5269
WTDay0	0	WT	2720
WTDay1	1	WT	4004
WTDay2	2	WT	4510
WTDay3	3	WT	5224
WTDay5	5	WT	3483
WTDay10	10	WT	4243
KitDay0	0	kita(lf)	3868
KitDay1	1	kita(lf)	2520
KitDay2	2	kita(lf)	4233
KitDay3	3	kita(lf)	853
KitDay3	3	kita(lf)	4408
KitDay5	5	kita(lf)	5411
KitDay10	10	kita(lf)	3431
Total WT			29453
Total kita(lf)			24724
Total WT + kita(lf)			54177
