# Supplementary material for: Pigment cell progenitor heterogeneity and reiteration of developmental signaling underlie melanocyte regeneration in zebrafish
Source: eLife. 2023 Apr 6;12:e78942. doi: 10.7554/eLife.78942 (PMC10139689; doi:10.7554/eLife.78942)
Supplement: Supplementary file 2. — Top 100 differentially expressed marker genes from melanocyte progenitor-0 (MP-0), melanocyte progenitor-1 (MP-1), cycling differentiation, direct differentiation, and melanocyte subclusters found in Figure 2A which were used to calculate enrichment scores on murine data in Figure 3—figure supplement 1. [file elife-78942-supp2.xlsx]

## Sheet: Sheet1
SUPPLEMENTAL FILE 2: Table of cluster-specific differentially-expressed genes
MP-0	MP-1	Cycling Differentiation	Direct Differentiation	Melanocytes
Dio3	Ptma	Pcna	Npm1	Mreg
Bco2	Hspa1a	Hmgn2	Hspd1	Prkar1b
Tmem242	Gadd45b	Tubb2b	Cycs	Sncb
Vim	Hspa1a	Dut	Hspe1	Vim
Cebpd	Dnajb1	Hmgb2	Atp5g1	Csrp2
Ftl1	Tmsb10	H3f3a	Nop58	Myo5b
Tmprss3	Hsp90aa1	Tuba1a	Cox7a2	Aldh9a1
Mdh1	Hspa1a	Hmga1	Snu13	Clu
C7	Foxp4	Stmn1	Fbl	Mylip
Ftl1	Atf3	Rpa3	Ptges3	Kif5b
Btg1	Hnrnpa0	Tma7	Hmgn2	Zdhhc2
Nsa2	Sox4	Hmgb2	Slirp	Spock3
Rsl24d1	Fosl1	Dnttip1	Cox7c	S100a10
Trim63	Gpr17	Pcbd1	Atr	Cdk15
Cirbp	Junb	Atp5g1	Hnrnpab	Uchl1
Kcnk6	Ptma	Fen1	Cox6a1	Anxa2
Mef2c	Stmn1	Mki67	Snrpf	Coro1c
Eif4ebp3	Rsrp1	Kpna2	Atp5b	Sptan1
Nop53	Hspa1a	Sub1	Pcbd1	Abat
Gramd1b	Irf1	Prdx1	Snrpg	Ahnak
Btf3	Fosb	Anp32b	Tma7	Dixdc1
Zbtb16	Krt18	Dynll1	Dkc1	Cavin1
Mcl1	Scn11a	Rpa2	C1qbp	Net1
Asmt	H3f3b	Atr	Hspa5	Cd81
Socs3	Ftl1	Cycs	Cox5a	Ly6g5b
Btg1	Gadd45b	Tuba1a	Snrpd1	Tyrp1
Ddx21	Khdrbs1	Snrpg	Snrpb	Gsn
Pax7	Junb	Cox7a2	Canx	Tns1
Tmsb10	Rcc2	Npm1	Tyrp1	Akt1s1
Rpl5	Marcks	Chaf1a	Nop56	Map7d3
Pnrc2	Ddx5	Cdk1	Eif4g1	Kif5b
Zdhhc14	Qk	Atp5l	Atp5g3	Sptbn1
Mcmdc2	Phlda2	Hspe1	Hnrnpa0	Lgals1
Rpl32	Rgcc	Banf1	Slc7a5	Gpnmb
Gtpbp4	Serpine2	Lig1	Gapdhs	Myl3
Rpl18	Crebzf	Cenpx	Actb	Slc39a10
Naca	Set	Tyrp1	Prmt1	Creg2
Mgat4b	Rtca	Top2a	Tuba1a	Dync1li2
Sox4	Arhgef1	Snrpd1	Marcksl1	Mink1
Hbp1	Uba52	Nutf2	Nop10	Ptgr1
Pax3	Baz1a	Cdkn1a	Hint1	Kank1
Romo1	Hnrnpab	Cox7c	Atp5j2	Mknk2
Zeb2	Crip1	Rrm2	Phlda1	Gyg
Chst15	Hnrnpab	Cnbp	Snrpe	Txn1
Eif3m	Rnf44	Snrpf	Snrpd2	Map1b
Rpl19	Hmgb2	Atp5g3	Pfn2	Myo1c
Ube2e3	Btg1	Ranbp1	Cdv3	Csde1
Foxo1	Ribc1	Mt1	Atp5a1	St8sia1
Eef1g	Snrpb	Cbx3	Nop2	Rab11fip1
Rpl34	Ppbp	Mcm2	Atp5l	S100a16
Hif3a	Foxo1	Nasp	Uqcr10	Fmn2
Jdp2	Snrpd2	Mcm3	Hypk	Nxpe3
Rpl10a	Eif4a1	Mad2l1	Rab1a	Lmo7
Acsl4	Ppp1r10	Atp5b	Mrpl12	Reep1
Serbp1	Pax3	Slirp	Atp5d	Kitl
Gadd45g	Adam8	Hint1	Atpif1	Mogat1
Junb	Hmgb1	Atp5d	Cnbp	Taok1
Rps16	Xbp1	Cox5a	Eif5a	Tmem65
Dedd2	Nop58	Hells	Eif2s2	Pnp2
Rpl28	Bzw1	Cks1b	Cox8a	Cnbp
Foxp4	Sgk1	Snrpe	Sub1	Arl6ip1
Sgk1	Nop10	Gch1	Gch1	Ckb
Rsl1d1	Sumo2	Mcm5	Lsm6	Rab34
Rps2	Dpf2	Qdpr	Psmb1	Gch1
Rpl7a	Tfec	Atp5j2	Pa2g4	Rcsd1
Kcnk5	Klf6	Tyms	Denr	Pah
Aqp3	Prmt1	Denr	Ssb	Anxa1
Tpbg	Tmem125	Hnrnpab	Pomp	Ywhaz
Mob2	Ddx39a	Gstt2	Got2	Ak1
Eif4ebp3	Fosl2	Hspd1	Tmem258	Gstp2
Fosb	Nop56	Hnrnpa0	Psmb7	Gpr143
Ypel1	Peli1	Atpif1	Ilf2	Elovl1
Ptbp3	Cdh11	Snrpb	Psma5	Eppk1
Rpl18a	Ddx21	Slbp	Atp5j	Cox7a1
Krt2	Zeb2	Atp5a1	Eif4a1	Oca2
Rps27	Snrpd1	Mcm6	Atp5g2	Tspan10
Rpl30	Rbbp6	Cenpf	Qdpr	Ppdpf
Rps26	Hmga1	Cox6a1	Tmem243	mt-Co1
Rpl27a	Mef2c	Ptges3	Hsp90b1	Rtn1
Rps17	Tuba1b	Fabp7	Atp6v0c	Sfn
Txnip	Syncrip	Atp5h	Uqcrh	Sh3pxd2a
Midn	Rgs3	Rbbp4	Atp5c1	Rabl6
Rpl15	Socs5	Atp5c1	Etf1	Jpt1
Ucp2	Snrpf	Cbx5	Ppib	Slc24a5
Mlph	Eif3b	Mcm4	Dynll1	Tax1bp1
Rps17	Set	Nusap1	Dad1	Eif3a
Zc2hc1a	Efna5	Cox8a	Tomm6	mt-Co2
Gja5	Vim	Ldhb	Ldhb	Anxa11
Serp1	Srsf3	Mcm7	Atp5h	Cfl1
Rpl35	H3f3a	Marcksl1	Nhp2	mt-Cytb
Zfp36l1	Gtpbp4	Eif5a	Nucks1	Lgmn
Ece2	Stat1	Tmem258	Ddx39a	Hipk3
H2-D1	Phc1	Atp5g2	Cotl1	Chd3
Ppp2r5d	Ybx1	Atp5j	Cbx3	Itm2b
Plp1	Kif26a	Rbm8a	Psmb3	Svil
Rpl31	Kmt2b	Uqcrh	Cox5a	Sesn1
Rps18	Tgif1	Ndufab1	Atp6v1g1	Slc20a2
Rpl23	Pcdh9	Ahcy	Ddx5	Upf3b
Eef1d	Nfix	Cox6c	Ndufs5	Golgb1
Rpl36	Ddx18	Atp5pb	Psma7	Chd4
