# Supplementary material for: Pigment cell progenitor heterogeneity and reiteration of developmental signaling underlie melanocyte regeneration in zebrafish
Source: eLife. 2023 Apr 6;12:e78942. doi: 10.7554/eLife.78942 (PMC10139689; doi:10.7554/eLife.78942)
Supplement: Supplementary file 3. — Previously validated primer sequences for kitlga and kita utilized in Figure 3 (Hultman et al., 2007; Parichy et al., 1999). [file elife-78942-supp3.xlsx]

## Sheet: Sheet1
SUPPLEMENTAL FILE 3: Table of RT-PCR primer sequences
Primer	Sequence (5' - 3')	Source
kitlga F	CACAGTTGCTGCCTATTCCA	Hultman et al. 2007
kitlga R	TGAATCCTCCAAACCAGGTC	Hultman et al. 2007
kita F	GCATCCTGCTGTGGGAGATC	Parichy et al. 1999
kita R	TCCCTGGATATGGACTACTC	Parichy et al. 1999
